# Supplementary material for: Transcriptional analysis of degenerate strain Clostridium beijerinckii DG-8052 reveals a pleiotropic response to CaCO3-associated recovery of solvent production
Source: PubMed Central journal article supplement (PMC5155275; doi:10.1038/srep38818), 2016-12-14
Supplement: srep38818-s1.pdf [file srep38818-s1.pdf]

**Transcriptional analysis of degenerate strain *Clostridium beijerinckii* DG-8052 reveals a pleiotropic response to CaCO<sub>3</sub>-associated recovery of solvent production**

Shengyin Jiao<sup>1</sup>, Yan Zhang<sup>2</sup>, Caixia Wan<sup>3</sup>, Jia Lv<sup>1</sup>, Renjia Du<sup>1</sup>, Ruijuan Zhang<sup>1</sup>, Bei Han<sup>1\*</sup>

<sup>1</sup>School of Public Health, Health Science Center, Xi'an Jiaotong University, Xi'an, China

<sup>2</sup>Institute for Genome Sciences, University of Maryland, School of Medicine, Baltimore, Maryland, US

<sup>3</sup>Department of Bioengineering, University of Missouri Columbia, Missouri, US

Shengyin Jiao and Yan Zhang contribute equally to this paper.

\*Corresponding author

Mailing address: P.O.44, NO.76 Yanta West Road, School of Public Health, Health Science Center, Xi'an Jiaotong University, Xi'an, 710061, Shaanxi, China.

## Additional files

FigS1. q-RT-PCR analysis results to show the mRNA levels changes of selected genes in *C. beijerinckii* DG-8052 in P2 medium with CaCO<sub>3</sub> at 12h (A) and 24 h (B). heat shock protein Hsp20 (Hsp20, Cbei\_4123), inosine 5'-monophosphate dehydrogenase (IMPDH, Cbei\_0331), transketolase domain-containing protein (TK, Cbei\_4871), adenylosuccinate lyase (ADSL, Cbei\_1221), glycoside hydrolase (GH, Cbei\_4669), electron transfer flavo protein subunit alpha-like protein(Alpha-ETF, Cbei\_0311), carbohydrate-binding family V/XII protein (CBD V/XII, Cbei\_2826), 4Fe-4S ferredoxin (FDX, Cbei\_0795), hypothetical protein(H-P, Cbei\_0870), peptidase U32 (P-U32); 24h: acetyl-CoA acetyltransferase (ACAT, Cbei\_0411), lytic transglycosylase (LTs, Cbei\_2261), 6,7-dimethyl-8-ribityllumazine synthase (RITS, Cbei\_1227), hypothetical protein (H-P1, Cbei\_4406), thiW protein (ThiW, Cbei\_4491), oxidoreductase FAD/NAD(P)-binding subunit (OR, Cbei\_3472 ), ferric uptake regulator family protein (FUR, Cbei\_1108), hypothetical protein (H-P2, Cbei\_1255), transketolase (TKTL, Cbei\_4644), phosphate ABC transporter ATPase (ATPase, Cbei\_1130).

Table S1. List of 20 genes and sequences of primers used in Q-RT-PCR experiments for the validation of microarray analysis

Table S2 COG functional classification showing significant changes in *C. beijerinckii* DG-8052 cultures with addition of 4g/L CaCO<sub>3</sub>

Table S3A. Differentially expressed (up regulation) genes in DG-8052 cultures with addition of 4g/L CaCO<sub>3</sub> vs DG-8052 during acidogenic phase

Table S3B. Differentially expressed (down regulation) genes in DG-8052 cultures with addition of 4g/L CaCO<sub>3</sub> vs DG-8052 during acidogenic phase

Table S3C. Differentially expressed (up regulation) genes in DG-8052 cultures with addition of 4g/L CaCO<sub>3</sub> vs DG-8052 during solventogenic phase

Table S3D. Differentially expressed (down regulation) genes in DG-8052 cultures with addition of 4g/L CaCO<sub>3</sub> vs DG-8052 during solventogenic phase

Table S4A. Genes differentially expressed by more than 5 folds in DG-8052 cultures with addition of 4g/L CaCO<sub>3</sub> vs DG-8052 during acidogenic phase

Table S4B. Genes differentially expressed by more than 5 folds in DG-8052 cultures with addition of 4g/L CaCO<sub>3</sub> vs DG-8052 during solventogenic phase

Table S5A. Fold change of solvent production genes in DG-8052 cultures with addition of 4g/L CaCO<sub>3</sub> vs DG-8052 by microarray analysis

Table S5B. Fold change of sugar transporter genes in DG-8052 cultures with addition of 4g/L CaCO<sub>3</sub> vs DG-8052 as determined by microarray analysis

Table S5C. Fold change of amino acids biosynthesis / metabolism genes in DG-8052 cultures with addition of 4g/L CaCO<sub>3</sub> vs DG-8052 according to microarray analysis.

Table S5D. Fold change of sigma factor & sporulation genes in DG-8052 cultures with addition of 4g/L CaCO<sub>3</sub> vs DG-8052 according to microarray analysis.

Table S5E. Fold change of cell division proteins in DG-8052 cultures with addition of 4g/L CaCO<sub>3</sub> vs DG-8052 according to microarray analysis.

Fig. S1.

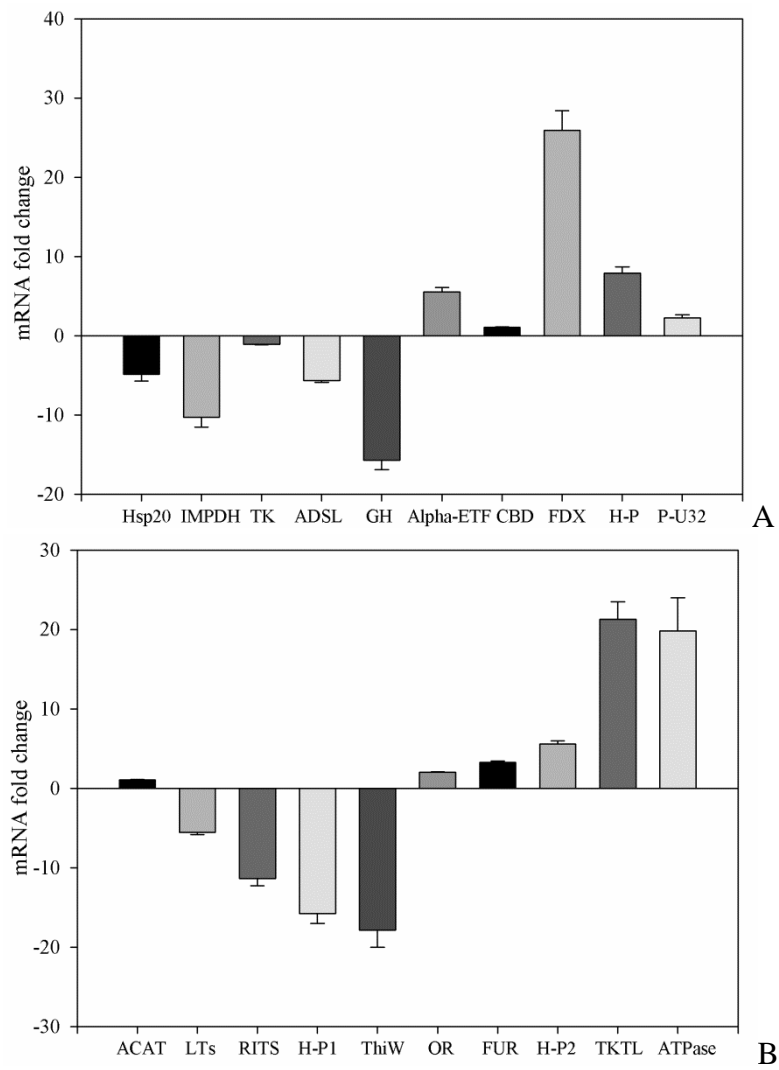

Table S1. List of 20 genes and sequences of primers used in validation of microarray analysis by Q-RT-PCR

| Gene symbol | Protein                                                       | Fold change<br>DG-8052 in P2+CaCO <sub>3</sub> vs<br>DG-8052 in P2 medium |          | primer sequence                                                  | Length<br>(bp) |
|-------------|---------------------------------------------------------------|---------------------------------------------------------------------------|----------|------------------------------------------------------------------|----------------|
|             |                                                               | Microarray<br>analysis                                                    | Q-RT-PCR |                                                                  |                |
| Cbei_4123   | heat shock protein Hsp20                                      | -3.15*                                                                    | -4.85*   | F: 5' AACCCAAACTCATTGGTGAA 3'<br>R: 5' ATGTTTGGATTGATACCTTT 3'   | 115            |
| Cbei_0331   | inosine 5'-monophosphate<br>dehydrogenase                     | -8.48*                                                                    | -10.3*   | F: 5' GAAGGCCGTCTAAAGGGATT 3'<br>R: 5' CACCTACTGCTGCTCCACAT 3'   | 121            |
| Cbei_4871   | transketolase<br>domain-containing protein                    | -2.36*                                                                    | -1.09*   | F: 5' CAGACATTGATGCTTCCCAA 3'<br>R: 5' AATGGCATTAGCAGGAAAGC 3'   | 129            |
| Cbei_1221   | adenylosuccinate lyase                                        | -3.25*                                                                    | -5.67*   | F: 5' CGGAAATTGCTCAAAGTGC 3'<br>R: 5' TGCCATAGCTGATGATCCTATT 3'  | 113            |
| Cbei_4669   | glycoside hydrolase                                           | -11.1*                                                                    | -15.7*   | F:5' TTGGTGATGAAGAGCTTGAAA 3'<br>R:5' TGGCTTACATTCAACGAAATAAA 3' | 150            |
| Cbei_0411   | acetyl-CoA acetyltransferase                                  | -2.73**                                                                   | +1.08**  | F: 5' TGTGGATCAGGTCTTAGAGCA 3'<br>R: 5' CCCATCTTGCTTTGTCCAAT 3'  | 130            |
| Cbei_2261   | lytic transglycosylase                                        | -3.98**                                                                   | -5.54**  | F: 5' CCAGCAAACTTGCGAATCT 3'<br>R: 5' CCATCACCAGATGAGGGACT 3'    | 197            |
| Cbei_1227   | 6,7-dimethyl-8-ribityllumazine<br>synthase                    | -6.04**                                                                   | -11.37** | F:5' CTCTTGAAAGTGGAAAGCCA 3'<br>R: 5' CGCCATTTCTATTGCTGAAA 3'    | 131            |
| Cbei_4406   | hypothetical protein                                          | -10.8**                                                                   | -15.78** | F: 5' CCAATAAACTTCCTGTTCCCA 3'<br>R: 5' TTCAATACCGATTGGAGCTG 3'  | 149            |
| Cbei_4491   | thiW protein                                                  | -11.1**                                                                   | -17.89** | F: 5' TCTCCAATTACTGCAATGCC 3'<br>R: 5' GAATGCATTTGTGACATCCC 3'   | 141            |
| Cbei_0311   | electron transfer flavo protein<br>subunit alpha-like protein | +3.25*                                                                    | +5.51*   | F: 5' CGGTAGAACTGTAAGGCCAAG 3'<br>R: 5' TGGTGCTTTATCATCAGCATT 3' | 135            |

|           |                                              |             |         |          |                                                                        |     |
|-----------|----------------------------------------------|-------------|---------|----------|------------------------------------------------------------------------|-----|
| Cbei_2826 | carbohydrate-binding<br>V/XII protein        | family      | +2.81*  | +1.10*   | F: 5' TCAATGGTGGAAACAGTTGGA 3'<br>R: 5' AGCGTCTTAGCAGGTTGTCC 3'        | 319 |
| Cbei_0795 | 4Fe-4S ferredoxin                            |             | +28.6*  | +25.9*   | F:5' AAACAATTCAATTTGGATGCC 3'<br>R: 5' TTAAATTTGCACAGGCCATT 3'         | 128 |
| Cbei_0870 | hypothetical protein                         |             | +5.32*  | +7.89*   | F:5' GACACCATAGAAGGAATTACGGA 3'<br>R:5'TCCAGGATTTATATCTAATAACAACACG 3' | 99  |
| Cbei_1113 | peptidase U32                                |             | +4.5*   | +2.25*   | F:5' AATTAAAGGAAGGCGTGGAA3'<br>R: 5' TTGCATCAACACCTGTTTCA 3'           | 138 |
| Cbei_3472 | oxidoreductase<br>FAD/NAD(P)-binding subunit |             | +3.94** | +2.01**  | F: 5' CCTGATTGAGCAAAGCTCCT 3'<br>R: 5' GTTGTCTCAGGACCTCATGG 3'         | 110 |
| Cbei_1108 | ferric uptake regulator family<br>protein    |             | +5.15** | +3.25**  | F: 5' CAAATCCATTTCCAATGTCTG 3'<br>R: 5' TTAGTCTCGTCCCAAAGCG 3'         | 133 |
| Cbei_1255 | hypothetical protein                         |             | +9.03** | +5.59**  | F: 5' CATATCCGGCAGGTGTTT 3'<br>R: 5' CGCTCCTTTAAGCTTTGCAT 3'           | 132 |
| Cbei_4644 | transketolase                                |             | +11.0** | +21.28** | F:5' CTGCTTTACCTGATGCTCCA 3'<br>R: 5' GCGCAAGATTAGCAGTTGAA 3'          | 108 |
| Cbei_1130 | phosphate ABC<br>ATPase                      | transporter | +14.8** | +19.79** | F: 5' CTTAAGAGGAGCAGCGCTTT 3'<br>R: 5' GCAGATGTTGGTTCATCCAT 3'         | 150 |

\*Fold change at 12h culture of *C. beijerinckii* DG8052 in P2+CaCO<sub>3</sub> medium; \*\* Fold change at 24h culture of *C. beijerinckii* DG8052 in P2+CaCO<sub>3</sub> medium.

Table S2 COG functional classification showing significant changes in *C.beijerinckii* DG-8052 cultures with addition of 4g/L CaCO<sub>3</sub>

| culture        | COG | COG definition                                  | <i>p</i> value | Benjamini* | Count** |
|----------------|-----|-------------------------------------------------|----------------|------------|---------|
| Up-regulated   |     |                                                 |                |            |         |
| 12h            | E   | Amino acid transport and metabolism             | 1.40E-04       | 4.70E-03   | 19      |
| 24h            | T   | Signal transduction mechanisms / Transcription  | 1.20E-02       | 2.90E-01   | 12      |
|                | J   | Translation, ribosomal structure and biogenesis | 8.60E-02       | 7.20E-01   | 8       |
| Down-regulated |     |                                                 |                |            |         |
| 12h            | E   | Amino acid transport and metabolism             | 6.20E-03       | 1.90E-01   | 21      |
|                | V   | Defense mechanisms                              | 4.70E-02       | 5.60E-01   | 19      |
| 24h            | J   | Translation, ribosomal structure and biogenesis | 2.60E-02       | 5.50E-01   | 11      |

\*significant groups were selected based upon Benjamini (<0.05);

\*\*number of genes within the given KEGG ID showing a significant change in their expression level;

Table S3A. Differentially expressed (up-regulation) genes in DG-8052 in P2 medium with CaCO<sub>3</sub> vs DG-8052 in P2 medium during acidogenesis

| GOTERM_ Category   | GO number          | Term                                                                | Count                                    | %    | P-value  |       |
|--------------------|--------------------|---------------------------------------------------------------------|------------------------------------------|------|----------|-------|
| Biological Process | 0043648            | dicarboxylic acid metabolic process                                 | 11                                       | 2.01 | 5.44E-04 |       |
|                    | 0009072            | aromatic amino acid family metabolic process                        | 9                                        | 1.65 | 0.001    |       |
|                    | 0046417            | chorismate metabolic process                                        | 9                                        | 1.65 | 0.001    |       |
|                    | 0009073            | aromatic amino acid family biosynthetic process                     | 9                                        | 1.65 | 0.001    |       |
|                    | 0046394            | carboxylic acid biosynthetic process                                | 24                                       | 4.39 | 0.002    |       |
|                    | 0016053            | organic acid biosynthetic process                                   | 24                                       | 4.39 | 0.002    |       |
|                    | 0006808            | regulation of nitrogen utilization                                  | 4                                        | 0.73 | 0.004    |       |
|                    | 0008652            | cellular amino acid biosynthetic process                            | 20                                       | 3.66 | 0.004    |       |
|                    | 0009309            | amine biosynthetic process                                          | 20                                       | 3.66 | 0.007    |       |
|                    | 0046174            | polyol catabolic process                                            | 4                                        | 0.73 | 0.009    |       |
|                    | 0042493            | response to drug                                                    | 8                                        | 1.46 | 0.025    |       |
|                    | 0015893            | drug transport                                                      | 8                                        | 1.46 | 0.025    |       |
|                    | 0015837            | amine transport                                                     | 7                                        | 1.28 | 0.026    |       |
|                    | 0006020            | inositol metabolic process                                          | 3                                        | 0.55 | 0.030    |       |
|                    | 0009095            | aromatic amino acid family biosynthetic process, prephenate pathway | 3                                        | 0.55 | 0.030    |       |
|                    | 0019310            | inositol catabolic process                                          | 3                                        | 0.55 | 0.030    |       |
|                    | 0007610            | behavior                                                            | 15                                       | 2.75 | 0.039    |       |
|                    | 0006935            | chemotaxis                                                          | 15                                       | 2.75 | 0.039    |       |
|                    | 0007626            | locomotory behavior                                                 | 15                                       | 2.74 | 0.039    |       |
|                    | 0042330            | taxis                                                               | 15                                       | 2.74 | 0.039    |       |
|                    | 0015849            | organic acid transport                                              | 8                                        | 1.46 | 0.041    |       |
|                    | 0046942            | carboxylic acid transport                                           | 8                                        | 1.46 | 0.041    |       |
|                    | 0015850            | organic alcohol transport                                           | 5                                        | 0.91 | 0.049    |       |
|                    | 0015904            | tetracycline transport                                              | 5                                        | 0.91 | 0.049    |       |
|                    | 0042891            | antibiotic transport                                                | 5                                        | 0.91 | 0.049    |       |
|                    | 0055114            | oxidation reduction                                                 | 30                                       | 5.48 | 0.052    |       |
|                    | Cellular Component | 0044462                                                             | external encapsulating structure part    | 8    | 1.46     | 0.024 |
|                    |                    | 0030288                                                             | outer membrane-bounded periplasmic space | 7    | 1.28     | 0.036 |
|                    |                    | 0042597                                                             | periplasmic space                        | 7    | 1.28     | 0.047 |



|                       |         |                                                                                                |    |      |       |
|-----------------------|---------|------------------------------------------------------------------------------------------------|----|------|-------|
| Molecular<br>Function | 0030313 | cell envelope                                                                                  | 11 | 2.01 | 0.054 |
|                       | 0016887 | ATPase activity                                                                                | 29 | 5.30 | 0.025 |
|                       | 0015293 | symporter activity                                                                             | 19 | 3.47 | 0.006 |
|                       | 0015294 | solute:cation symporter activity                                                               | 19 | 3.47 | 0.006 |
|                       | 0042626 | ATPase activity, coupled to transmembrane movement of substances                               | 14 | 2.56 | 0.009 |
|                       | 0043492 | ATPase activity, coupled to movement of substances                                             | 14 | 2.56 | 0.009 |
|                       | 0051119 | sugar transmembrane transporter activity                                                       | 19 | 3.47 | 0.011 |
|                       | 0016628 | oxidoreductase activity, acting on the CH-CH group of donors, NAD or NADP as acceptor          | 5  | 0.91 | 0.011 |
|                       | 0016820 | hydrolase activity, acting on acid anhydrides, catalyzing transmembrane movement of substances | 14 | 2.56 | 0.012 |
|                       | 0005402 | cation:sugar symporter activity                                                                | 17 | 3.11 | 0.015 |
|                       | 0015399 | primary active transmembrane transporter activity                                              | 14 | 2.56 | 0.021 |
|                       | 0015405 | P-P-bond-hydrolysis-driven transmembrane transporter activity                                  | 14 | 2.56 | 0.021 |
|                       | 0042623 | ATPase activity, coupled                                                                       | 17 | 3.11 | 0.027 |
|                       | 0015238 | drug transporter activity                                                                      | 8  | 1.46 | 0.030 |
|                       | 0008509 | anion transmembrane transporter activity                                                       | 7  | 1.28 | 0.030 |
|                       | 0016769 | transferase activity, transferring nitrogenous groups                                          | 9  | 1.65 | 0.033 |
|                       | 0008483 | transaminase activity                                                                          | 8  | 1.46 | 0.036 |
|                       | 0015295 | solute:hydrogen symporter activity                                                             | 15 | 2.74 | 0.051 |
|                       | 0005351 | sugar:hydrogen symporter activity                                                              | 15 | 2.74 | 0.051 |

Table S3B. Differentially expressed (down-regulation) genes in DG-8052 in P2 medium with CaCO<sub>3</sub> vs DG-8052 in P2 medium during acidogenesis

| GOTERM<br>_Category   | GO number             | Term                                                              | Count | %    | P-value  |  |
|-----------------------|-----------------------|-------------------------------------------------------------------|-------|------|----------|--|
| Biological<br>Process | 0034220               | ion transmembrane transport                                       | 10    | 1.52 | 4.49E-06 |  |
|                       | 0015985               | energy coupled proton transport,<br>down electrochemical gradient | 8     | 1.21 | 2.56E-05 |  |
|                       | 0015986               | ATP synthesis coupled proton<br>transport                         | 8     | 1.21 | 2.56E-05 |  |
|                       | 0015992               | proton transport                                                  | 8     | 1.21 | 6.33E-05 |  |
|                       | 0006818               | hydrogen transport                                                | 8     | 1.21 | 6.33E-05 |  |
|                       | 0015672               | monovalent inorganic cation<br>transport                          | 11    | 1.67 | 1.88E-04 |  |
|                       | 0006119               | oxidative phosphorylation                                         | 8     | 1.21 | 8.11E-04 |  |
|                       | 0009142               | nucleoside triphosphate biosynthetic<br>process                   | 11    | 1.67 | 8.18E-04 |  |
|                       | 0044271               | nitrogen compound biosynthetic<br>process                         | 46    | 6.97 | 9.39E-04 |  |
|                       | 0009165               | nucleotide biosynthetic process                                   | 18    | 2.73 | 0.001    |  |
|                       | 0046034               | ATP metabolic process                                             | 10    | 1.52 | 0.001    |  |
|                       | 0006754               | ATP biosynthetic process                                          | 10    | 1.52 | 0.001    |  |
|                       | 0006811               | ion transport                                                     | 21    | 3.18 | 0.001    |  |
|                       | 0006164               | purine nucleotide biosynthetic<br>process                         | 13    | 1.97 | 0.001    |  |
|                       | 0009141               | nucleoside triphosphate metabolic<br>process                      | 11    | 1.67 | 0.002    |  |
|                       | 0009206               | purine ribonucleoside triphosphate<br>biosynthetic process        | 10    | 1.52 | 0.002    |  |
|                       | 0009145               | purine nucleoside triphosphate<br>biosynthetic process            | 10    | 1.52 | 0.002    |  |
|                       | 0009201               | ribonucleoside triphosphate<br>biosynthetic process               | 10    | 1.52 | 0.002    |  |
|                       | 0006163               | purine nucleotide metabolic process                               | 13    | 1.97 | 0.002    |  |
|                       | 0006812               | cation transport                                                  | 17    | 2.58 | 0.003    |  |
|                       | 0009199               | ribonucleoside triphosphate<br>metabolic process                  | 10    | 1.52 | 0.003    |  |
|                       | 0009205               | purine ribonucleoside triphosphate<br>metabolic process           | 10    | 1.52 | 0.003    |  |
|                       | 0009144               | purine nucleoside triphosphate<br>metabolic process               | 10    | 1.52 | 0.003    |  |
|                       | 0009064               | glutamine family amino acid<br>metabolic process                  | 8     | 1.21 | 0.032    |  |
|                       | 0006526               | arginine biosynthetic process                                     | 4     | 0.60 | 0.039    |  |
|                       | Cellular<br>Component |                                                                   |       |      |          |  |

|                    |         |                                                                           |    |      |          |
|--------------------|---------|---------------------------------------------------------------------------|----|------|----------|
|                    | 0045259 | proton-transporting ATP synthase complex                                  | 8  | 1.21 | 1.10E-07 |
|                    | 0016469 | proton-transporting two-sector ATPase complex                             | 8  | 1.21 | 1.46E-06 |
|                    | 0045261 | proton-transporting ATP synthase complex, catalytic core F(1)             | 5  | 0.76 | 1.76E-04 |
|                    | 0033178 | proton-transporting two-sector ATPase complex, catalytic domain           | 5  | 0.76 | 0.001    |
|                    | 0006793 | phosphorus metabolic process                                              | 26 | 3.94 | 0.003    |
|                    | 0009152 | purine ribonucleotide biosynthetic process                                | 11 | 1.67 | 0.004    |
|                    | 0034654 | nucleobase, nucleoside, nucleotide and nucleic acid biosynthetic process  | 19 | 2.88 | 0.005    |
|                    | 0034404 | nucleobase, nucleoside and nucleotide biosynthetic process                | 19 | 2.88 | 0.005    |
|                    | 0009150 | purine ribonucleotide metabolic process                                   | 11 | 1.67 | 0.005    |
|                    | 0042777 | plasma membrane ATP synthesis coupled proton transport                    | 4  | 0.61 | 0.006    |
|                    | 0006350 | transcription                                                             | 49 | 7.42 | 0.006    |
|                    | 0006796 | phosphate metabolic process                                               | 25 | 3.79 | 0.006    |
|                    | 0009253 | peptidoglycan catabolic process                                           | 7  | 1.06 | 0.007    |
|                    | 0006027 | glycosaminoglycan catabolic process                                       | 7  | 1.06 | 0.007    |
|                    | 0009260 | ribonucleotide biosynthetic process                                       | 11 | 1.67 | 0.010105 |
|                    | 0016310 | phosphorylation                                                           | 23 | 3.48 | 0.011    |
|                    | 0009259 | ribonucleotide metabolic process                                          | 11 | 1.67 | 0.012    |
|                    | 0006026 | aminoglycan catabolic process                                             | 7  | 1.06 | 0.014    |
|                    | 0055085 | transmembrane transport                                                   | 10 | 1.52 | 0.014    |
|                    | 0006525 | arginine metabolic process                                                | 5  | 0.76 | 0.015    |
|                    | 0033177 | proton-transporting two-sector ATPase complex, proton-transporting domain | 3  | 0.45 | 0.018    |
|                    | 0045263 | proton-transporting ATP synthase complex, coupling factor F(o)            | 3  | 0.45 | 0.018    |
| Molecular Function |         |                                                                           |    |      |          |
|                    | 0046933 | hydrogen ion transporting ATP synthase activity, rotational mechanism     | 7  | 1.06 | 8.16E-05 |
|                    | 0015078 | hydrogen ion transmembrane transporter activity                           | 8  | 1.21 | 9.38E-05 |
|                    | 0015077 | monovalent inorganic cation transmembrane transporter activity            | 9  | 1.36 | 1.58E-04 |
|                    | 0022890 | inorganic cation transmembrane transporter activity                       | 12 | 1.82 | 0.003    |
|                    | 0046961 | proton-transporting ATPase activity, rotational mechanism                 | 5  | 0.76 | 0.003    |
|                    | 0003796 | lysozyme activity                                                         | 5  | 0.76 | 0.011    |
|                    | 0019829 | cation-transporting ATPase activity                                       | 5  | 0.76 | 0.011    |

---

|         |                                                               |   |      |       |
|---------|---------------------------------------------------------------|---|------|-------|
| 0019898 | extrinsic to membrane                                         | 4 | 0.61 | 0.014 |
| 0042625 | ATPase activity, coupled to<br>transmembrane movement of ions | 8 | 1.21 | 0.043 |

---

Table S3C. Differentially expressed (up-regulation) genes in DG-8052 in P2 medium with CaCO<sub>3</sub> vs DG-8052 in P2 medium during solventogenesis

| GOTERM_ Category   | GO number | Term                                                          | Count | %    | P-value  |
|--------------------|-----------|---------------------------------------------------------------|-------|------|----------|
| Biological Process |           |                                                               |       |      |          |
|                    | 0015893   | drug transport                                                | 14    | 1.56 | 0.001    |
|                    | 0042493   | response to drug                                              | 14    | 1.56 | 0.001    |
|                    | 0006820   | anion transport                                               | 11    | 1.22 | 0.002    |
|                    | 0009073   | aromatic amino acid family biosynthetic process               | 11    | 1.22 | 0.004    |
|                    | 0046417   | chorismate metabolic process                                  | 11    | 1.22 | 0.004    |
|                    | 0009072   | aromatic amino acid family metabolic process                  | 11    | 1.22 | 0.004    |
|                    | 0015698   | inorganic anion transport                                     | 9     | 1.00 | 0.005    |
|                    | 0042891   | antibiotic transport                                          | 8     | 0.89 | 0.008    |
|                    | 0015850   | organic alcohol transport                                     | 8     | 0.89 | 0.008    |
|                    | 0015904   | tetracycline transport                                        | 8     | 0.89 | 0.008    |
|                    | 0042430   | indole and derivative metabolic process                       | 5     | 0.56 | 0.014    |
|                    | 0046219   | indolalkylamine biosynthetic process                          | 5     | 0.56 | 0.014    |
|                    | 0000162   | tryptophan biosynthetic process                               | 5     | 0.56 | 0.014    |
|                    | 0006568   | tryptophan metabolic process                                  | 5     | 0.56 | 0.014    |
|                    | 0042434   | indole derivative metabolic process                           | 5     | 0.56 | 0.014    |
|                    | 0008272   | sulfate transport                                             | 5     | 0.56 | 0.014    |
|                    | 0042435   | indole derivative biosynthetic process                        | 5     | 0.56 | 0.014    |
|                    | 0006586   | indolalkylamine metabolic process                             | 5     | 0.56 | 0.014    |
|                    | 0005996   | monosaccharide metabolic process                              | 24    | 2.67 | 0.014    |
|                    | 0043648   | dicarboxylic acid metabolic process                           | 12    | 1.34 | 0.016    |
|                    | 0009082   | branched chain family amino acid biosynthetic process         | 7     | 0.78 | 0.022    |
|                    | 0009081   | branched chain family amino acid metabolic process            | 7     | 0.78 | 0.022    |
|                    | 0010035   | response to inorganic substance                               | 4     | 0.45 | 0.023    |
|                    | 0006808   | regulation of nitrogen utilization                            | 4     | 0.45 | 0.023    |
|                    | 0006979   | response to oxidative stress                                  | 4     | 0.45 | 0.023    |
|                    | 0006534   | cysteine metabolic process                                    | 5     | 0.56 | 0.027    |
|                    | 0046677   | response to antibiotic                                        | 9     | 1.00 | 0.031    |
|                    | 0055114   | oxidation reduction                                           | 50    | 5.57 | 0.044    |
|                    | 0042330   | taxis                                                         | 23    | 2.56 | 0.045    |
|                    | 0007626   | locomotory behavior                                           | 23    | 2.56 | 0.045    |
|                    | 0007610   | behavior                                                      | 23    | 2.56 | 0.045    |
|                    | 0006935   | chemotaxis                                                    | 23    | 2.56 | 0.045    |
| Molecular Function |           |                                                               |       |      |          |
|                    | 0016744   | transferase activity, transferring aldehyde or ketonic groups | 10    | 1.11 | 2.64E-04 |
|                    | 0015238   | drug transporter activity                                     | 14    | 1.56 | 0.001    |

|                    |         |                                                                                                |     |       |          |
|--------------------|---------|------------------------------------------------------------------------------------------------|-----|-------|----------|
|                    | 0015297 | antiporter activity                                                                            | 15  | 1.67  | 0.002    |
|                    | 0015103 | inorganic anion transmembrane transporter activity                                             | 9   | 1.00  | 0.003    |
|                    | 0016836 | hydro-lyase activity                                                                           | 13  | 1.45  | 0.003    |
|                    | 0016860 | intramolecular oxidoreductase activity                                                         | 12  | 1.34  | 0.004    |
|                    | 0016861 | intramolecular oxidoreductase activity, interconverting aldoses and ketoses                    | 11  | 1.23  | 0.004    |
|                    | 0015299 | solute:hydrogen antiporter activity                                                            | 9   | 1.00  | 0.005    |
|                    | 0015298 | solute:cation antiporter activity                                                              | 9   | 1.00  | 0.005    |
|                    | 0015300 | solute:solute antiporter activity                                                              | 9   | 1.00  | 0.005    |
|                    | 0015520 | tetracycline:hydrogen antiporter activity                                                      | 8   | 0.89  | 0.009    |
|                    | 0016209 | antioxidant activity                                                                           | 8   | 0.89  | 0.009    |
|                    | 0008493 | tetracycline transporter activity                                                              | 8   | 0.89  | 0.009    |
|                    | 0015307 | drug:hydrogen antiporter activity                                                              | 8   | 0.89  | 0.009    |
|                    | 0042895 | antibiotic transporter activity                                                                | 8   | 0.89  | 0.009    |
|                    | 0008565 | protein transporter activity                                                                   | 11  | 1.22  | 0.013    |
|                    | 0008509 | anion transmembrane transporter activity                                                       | 10  | 1.11  | 0.021    |
|                    | 0019842 | vitamin binding                                                                                | 21  | 2.34  | 0.022    |
|                    | 0004802 | transketolase activity                                                                         | 4   | 0.45  | 0.024    |
|                    | 0043492 | ATPase activity, coupled to movement of substances                                             | 19  | 2.12  | 0.028    |
|                    | 0042626 | ATPase activity, coupled to transmembrane movement of substances                               | 19  | 2.12  | 0.028    |
|                    | 0016820 | hydrolase activity, acting on acid anhydrides, catalyzing transmembrane movement of substances | 19  | 2.12  | 0.038    |
|                    | 0030976 | thiamin pyrophosphate binding                                                                  | 6   | 0.67  | 0.043    |
| Cellular Component |         |                                                                                                |     |       |          |
|                    | 0031224 | intrinsic to membrane                                                                          | 111 | 12.37 | 5.77E-05 |
|                    | 0016021 | integral to membrane                                                                           | 109 | 12.14 | 2.37E-04 |
|                    | 0030313 | cell envelope                                                                                  | 15  | 1.67  | 0.021    |
|                    | 0031975 | envelope                                                                                       | 15  | 1.67  | 0.026    |
|                    | 0030312 | external encapsulating structure                                                               | 15  | 1.67  | 0.040    |

Table S3D. Differentially expressed (down-regulation) genes in DG-8052 in P2 medium with CaCO<sub>3</sub> vs DG-8052 in P2 medium during solventogenesis.

| GOTERM_<br>Category   | GO number | Term                                                           | Count | %    | P-value  |
|-----------------------|-----------|----------------------------------------------------------------|-------|------|----------|
| Biological<br>Process |           |                                                                |       |      |          |
|                       | 0015985   | energy coupled proton transport, down electrochemical gradient | 8     | 0.87 | 4.05E-04 |
|                       | 0015986   | ATP synthesis coupled proton transport                         | 8     | 0.87 | 4.05E-04 |
|                       | 0015992   | proton transport                                               | 8     | 0.87 | 9.43E-04 |
|                       | 0006818   | hydrogen transport                                             | 8     | 0.87 | 9.43E-04 |
|                       | 0015672   | monovalent inorganic cation transport                          | 12    | 1.30 | 0.001    |
|                       | 0042364   | water-soluble vitamin biosynthetic process                     | 20    | 2.17 | 0.002    |
|                       | 0006767   | water-soluble vitamin metabolic process                        | 20    | 2.17 | 0.002    |
|                       | 0006754   | ATP biosynthetic process                                       | 12    | 1.30 | 0.002    |
|                       | 0046034   | ATP metabolic process                                          | 12    | 1.30 | 0.002    |
|                       | 0044271   | nitrogen compound biosynthetic process                         | 62    | 6.73 | 0.002    |
|                       | 0009119   | ribonucleoside metabolic process                               | 11    | 1.19 | 0.002    |
|                       | 0018130   | heterocycle biosynthetic process                               | 29    | 3.15 | 0.003    |
|                       | 0009201   | ribonucleoside triphosphate biosynthetic process               | 12    | 1.30 | 0.003    |
|                       | 0009206   | purine ribonucleoside triphosphate biosynthetic process        | 12    | 1.30 | 0.003    |
|                       | 0009145   | purine nucleoside triphosphate biosynthetic process            | 12    | 1.30 | 0.003    |
|                       | 0006766   | vitamin metabolic process                                      | 20    | 2.17 | 0.003    |
|                       | 0009110   | vitamin biosynthetic process                                   | 20    | 2.17 | 0.003    |
|                       | 0009141   | nucleoside triphosphate metabolic process                      | 13    | 1.41 | 0.003    |
|                       | 0009205   | purine ribonucleoside triphosphate metabolic process           | 12    | 1.30 | 0.004    |
|                       | 0009199   | ribonucleoside triphosphate metabolic process                  | 12    | 1.30 | 0.004    |
|                       | 0009144   | purine nucleoside triphosphate metabolic process               | 12    | 1.30 | 0.004    |
|                       | 0046128   | purine ribonucleoside metabolic process                        | 9     | 0.98 | 0.005    |
|                       | 0034220   | ion transmembrane transport                                    | 8     | 0.87 | 0.006    |
|                       | 0009142   | nucleoside triphosphate biosynthetic process                   | 12    | 1.30 | 0.006    |
|                       | 0042278   | purine nucleoside metabolic process                            | 9     | 0.98 | 0.008    |
|                       | 0006119   | oxidative phosphorylation                                      | 8     | 0.87 | 0.010    |
|                       | 0033014   | tetrapyrrole biosynthetic process                              | 13    | 1.41 | 0.011    |
|                       | 0033013   | tetrapyrrole metabolic process                                 | 13    | 1.41 | 0.011    |
|                       | 0006779   | porphyrin biosynthetic process                                 | 13    | 1.41 | 0.011    |
|                       | 0006778   | porphyrin metabolic process                                    | 13    | 1.41 | 0.011    |
|                       | 0009152   | purine ribonucleotide biosynthetic process                     | 13    | 1.41 | 0.011    |

|                    |         |                                                                          |    |      |          |
|--------------------|---------|--------------------------------------------------------------------------|----|------|----------|
|                    | 0001522 | pseudouridine synthesis                                                  | 6  | 0.65 | 0.012    |
|                    | 0009150 | purine ribonucleotide metabolic process                                  | 13 | 1.41 | 0.014    |
|                    | 0006812 | cation transport                                                         | 20 | 2.17 | 0.015    |
|                    | 0006164 | purine nucleotide biosynthetic process                                   | 14 | 1.52 | 0.018    |
|                    | 0042777 | plasma membrane ATP synthesis coupled proton transport                   | 4  | 0.43 | 0.020    |
|                    | 0006091 | generation of precursor metabolites and energy                           | 17 | 1.85 | 0.022    |
|                    | 0006793 | phosphorus metabolic process                                             | 32 | 3.47 | 0.022    |
|                    | 0051186 | cofactor metabolic process                                               | 28 | 3.04 | 0.025    |
|                    | 0006163 | purine nucleotide metabolic process                                      | 14 | 1.52 | 0.027    |
|                    | 0009116 | nucleoside metabolic process                                             | 13 | 1.41 | 0.028    |
|                    | 0009260 | ribonucleotide biosynthetic process                                      | 13 | 1.41 | 0.028    |
|                    | 0009236 | cobalamin biosynthetic process                                           | 10 | 1.09 | 0.030    |
|                    | 0009235 | cobalamin metabolic process                                              | 10 | 1.09 | 0.030    |
|                    | 0009259 | ribonucleotide metabolic process                                         | 13 | 1.41 | 0.034    |
|                    | 0006796 | phosphate metabolic process                                              | 31 | 3.37 | 0.034    |
|                    | 0006811 | ion transport                                                            | 23 | 2.50 | 0.038    |
|                    | 0009064 | glutamine family amino acid metabolic process                            | 10 | 1.09 | 0.039    |
|                    | 0016310 | phosphorylation                                                          | 29 | 3.15 | 0.0402   |
|                    | 0034404 | nucleobase, nucleoside and nucleotide biosynthetic process               | 22 | 2.39 | 0.042    |
|                    | 0034654 | nucleobase, nucleoside, nucleotide and nucleic acid biosynthetic process | 22 | 2.39 | 0.042    |
| Cellular Component |         |                                                                          |    |      |          |
|                    | 0045259 | proton-transporting ATP synthase complex                                 | 8  | 0.87 | 3.98E-06 |
|                    | 0016469 | proton-transporting two-sector ATPase complex                            | 8  | 0.87 | 4.76E-05 |
|                    | 0045261 | proton-transporting ATP synthase complex, catalytic core F(1)            | 5  | 0.54 | 0.001    |
|                    | 0019861 | flagellum                                                                | 11 | 1.19 | 0.005    |
|                    | 0042995 | cell projection                                                          | 11 | 1.19 | 0.005    |
|                    | 0033178 | proton-transporting two-sector ATPase complex, catalytic domain          | 5  | 0.54 | 0.007    |
| Molecular Function |         |                                                                          |    |      |          |
|                    | 0046933 | hydrogen ion transporting ATP synthase activity, rotational mechanism    | 7  | 0.76 | 5.83E-04 |
|                    | 0015078 | hydrogen ion transmembrane transporter activity                          | 8  | 0.87 | 8.55E-04 |
|                    | 0015077 | monovalent inorganic cation transmembrane transporter activity           | 9  | 0.98 | 0.002    |
|                    | 0016866 | intramolecular transferase activity                                      | 10 | 1.09 | 0.004    |
|                    | 0046961 | proton-transporting ATPase activity, rotational mechanism                | 5  | 0.54 | 0.010    |



---

|         |                                                     |    |      |       |
|---------|-----------------------------------------------------|----|------|-------|
| 0009982 | pseudouridine synthase activity                     | 6  | 0.65 | 0.011 |
| 0008026 | ATP-dependent helicase activity                     | 9  | 0.98 | 0.021 |
| 0070035 | purine NTP-dependent helicase activity              | 9  | 0.98 | 0.021 |
| 0022890 | inorganic cation transmembrane transporter activity | 12 | 1.30 | 0.032 |
| 0019829 | cation-transporting ATPase activity                 | 5  | 0.54 | 0.036 |
| 0050660 | FAD binding                                         | 14 | 1.52 | 0.041 |

---

Table S4A. Genes differentially expressed by more than 5 folds in DG-8052 in P2 medium with CaCO<sub>3</sub> vs DG-8052 in P2 medium during acidogenesis.

| Fold Change | up/down | Gene Symbol | Gene Product                                                  |
|-------------|---------|-------------|---------------------------------------------------------------|
| 4.5         | up      | Cbei_0238   | hypothetical protein                                          |
| 4.5         | up      | Cbei_3629   | hypothetical protein                                          |
| 4.6         | up      | Cbei_4551   | fructose-bisphosphate aldolase                                |
| 4.7         | up      | Cbei_5006   | LrgB family protein                                           |
| 4.8         | up      | Cbei_4688   | PAS/PAC sensor-containing diguanylate cyclase                 |
| 4.8         | up      | Cbei_2306   | phage integrase family protein                                |
| 4.8         | up      | Cbei_1478   | PTS system lactose/cellobiose family transportersubunit IIC   |
| 4.8         | up      | Cbei_5058   | EmrB/QacA family drug resistance transporter                  |
| 4.8         | up      | Cbei_3364   | natural resistance-associated macrophageprotein               |
| 4.9         | up      | Cbei_1205   | tRNA pseudouridine synthase B                                 |
| 4.9         | up      | Cbei_1282   | di-trans-poly-cis-decaprenylcistransferase                    |
| 4.9         | up      | Cbei_1182   | ribonuclease HII                                              |
| 4.9         | up      | Cbei_4101   | secretion protein HlyD family protein                         |
| 4.9         | up      | Cbei_4432   | monosaccharide-transporting ATPase                            |
| 4.9         | up      | Cbei_4098   | MarR family transcriptional regulator                         |
| 4.9         | up      | Cbei_3703   | transport system permease                                     |
| 5           | up      | Cbei_1482   | hypothetical protein                                          |
| 5           | up      | Cbei_4935   | LuxR family transcriptional regulator                         |
| 5.1         | up      | Cbei_3625   | methyl-accepting chemotaxis sensory transducer                |
| 5.1         | up      | Cbei_1493   | cell wall hydrolase/autolysin                                 |
| 5.1         | up      | Cbei_3811   | PTS system lactose/cellobiose-specifictransporter subunit IIA |
| 5.2         | up      | Cbei_4570   | 3-dehydroquinate dehydratase                                  |
| 5.2         | up      | Cbei_4203   | glutamate synthase NADH/NADPH small subunit                   |
| 5.2         | up      | Cbei_1918   | "phosphotransferase system, EIIC"                             |
| 5.2         | up      | Cbei_3295   | sugar ABC transporter periplasmic protein                     |
| 5.2         | up      | Cbei_4217   | type II secretion system protein                              |
| 5.3         | up      | Cbei_4685   | PTS system lactose/cellobiose-specifictransporter subunit IIA |
| 5.3         | up      | Cbei_1480   | LytTR family two component transcriptionalregulator           |
| 5.3         | up      | Cbei_4183   | chemotaxis protein CheA                                       |
| 5.3         | up      | Cbei_0870   | hypothetical protein                                          |
| 5.4         | up      | Cbei_4547   | oxidoreductase domain-containing protein                      |
| 5.4         | up      | Cbei_3185   | methionine--tRNA ligase                                       |
| 5.4         | up      | Cbei_0270   | ---                                                           |
| 5.4         | up      | Cbei_4686   | sigma-54 factor interaction domain-containingprotein          |
| 5.5         | up      | Cbei_4428   | D-galactose-binding periplasmic protein                       |
| 5.6         | up      | Cbei_1762   | extracellular ligand-binding receptor                         |
| 5.6         | up      | Cbei_4980   | EmrB/QacA family drug resistance transporter                  |
| 5.6         | up      | Cbei_5035   | aminoglycoside phosphotransferase                             |
| 5.7         | up      | Cbei_4675   | glycoside hydrolase                                           |
| 5.7         | up      | Cbei_4358   | AraC family transcriptional regulator                         |
| 5.7         | up      | Cbei_2853   | major facilitator superfamily transporter                     |
| 5.7         | up      | Cbei_5037   | dihydrodipicolinate synthase                                  |
| 5.8         | up      | Cbei_2214   | ---                                                           |
| 5.8         | up      | Cbei_0235   | encapsulation protein CapA                                    |

---

|     |    |           |                                                                  |
|-----|----|-----------|------------------------------------------------------------------|
| 5.9 | up | Cbei_1766 | ABC transporter                                                  |
| 5.9 | up | Cbei_5052 | hypothetical protein                                             |
| 6   | up | Cbei_4006 | butyrate kinase                                                  |
| 6.1 | up | Cbei_4099 | EmrB/QacA family drug resistance transporter                     |
| 6.1 | up | Cbei_3518 | aldose 1-epimerase                                               |
| 6.1 | up | Cbei_4772 | methyl-accepting chemotaxis sensory transducer                   |
| 6.2 | up | Cbei_4180 | response regulator receiver modulated CheBmethyltransferase      |
| 6.3 | up | Cbei_2771 | methyl-accepting chemotaxis sensory transducer                   |
| 6.3 | up | Cbei_1763 | inner-membrane translocator                                      |
| 6.4 | up | Cbei_4546 | xylose isomerase domain-containing protein                       |
| 6.4 | up | Cbei_4078 | periplasmic binding protein/LacI transcriptional regulator       |
| 6.4 | up | Cbei_0265 | hypothetical protein                                             |
| 6.5 | up | Cbei_4548 | "thiamine pyrophosphate protein, central region"                 |
| 6.5 | up | Cbei_4206 | "glutamine synthetase, type I"                                   |
| 6.5 | up | Cbei_2213 | "peptidase M48, Ste24p"                                          |
| 6.6 | up | Cbei_4126 | alpha-N-arabinofuranosidase                                      |
| 6.6 | up | Cbei_4676 | response regulator receiver protein                              |
| 6.6 | up | Cbei_1079 | hypothetical protein                                             |
| 6.6 | up | Cbei_2793 | ABC transporter                                                  |
| 6.8 | up | Cbei_4543 | coenzyme A transferase                                           |
| 7   | up | Cbei_1302 | ECF subfamily RNA polymerase sigma-24 factor                     |
| 7   | up | Cbei_1481 | hypothetical protein                                             |
| 7   | up | Cbei_1301 | membrane associated protein                                      |
| 7   | up | Cbei_2789 | L-lactate dehydrogenase                                          |
| 7.1 | up | Cbei_4130 | type 11 methyltransferase                                        |
| 7.2 | up | Cbei_3915 | MarR family transcriptional regulator                            |
| 7.2 | up | Cbei_0653 | polysaccharide deacetylase                                       |
| 7.3 | up | Cbei_4692 | TetR family transcriptional regulator                            |
| 7.3 | up | Cbei_3736 | major facilitator superfamily transporter                        |
| 7.3 | up | Cbei_0488 | hypothetical protein                                             |
| 7.4 | up | Cbei_1011 | formate acetyltransferase                                        |
| 7.4 | up | Cbei_2092 | transcriptional regulator TrmB                                   |
| 7.4 | up | Cbei_0571 | hypothetical protein                                             |
| 7.5 | up | Cbei_2061 | ammonium transporter                                             |
| 7.5 | up | Cbei_4981 | MarR family transcriptional regulator                            |
| 7.6 | up | Cbei_0266 | hypothetical protein                                             |
| 7.7 | up | Cbei_1523 | hypothetical protein                                             |
| 7.8 | up | Cbei_4205 | response regulator receiver/ANTARdomain-containing protein       |
| 7.9 | up | Cbei_1080 | inner-membrane translocator                                      |
| 7.9 | up | Cbei_2462 | hypothetical protein                                             |
| 7.9 | up | Cbei_4097 | amino acid permease-associated protein                           |
| 7.9 | up | Cbei_1475 | PTS system lactose/cellobiose-specific transporter subunit IIA   |
| 8.1 | up | Cbei_1443 | Alpha-glucosidase                                                |
| 8.1 | up | Cbei_1749 | anthranilate synthase component I                                |
| 8.2 | up | Cbei_3299 | multidrug ABC transporter ATPase                                 |
| 8.3 | up | Cbei_1992 | molybdenum ABC transporter periplasmic molybdate-binding protein |
| 8.3 | up | Cbei_1081 | ABC transporter                                                  |

---

|     |    |           |                                                                  |
|-----|----|-----------|------------------------------------------------------------------|
| 8.3 | up | Cbei_1442 | binding-protein-dependent transport system innermembrane protein |
| 8.4 | up | Cbei_0215 | 3-isopropylmalate dehydratase small subunit                      |
| 8.4 | up | Cbei_4354 | iron-containing alcohol dehydrogenase                            |
| 8.5 | up | Cbei_1906 | ---                                                              |
| 8.5 | up | Cbei_2794 | ABC transporter                                                  |
| 8.6 | up | Cbei_2093 | multidrug ABC transporter ATPase                                 |
| 8.7 | up | Cbei_5033 | nitrogen regulatory protein P-II                                 |
| 8.7 | up | Cbei_5043 | inner-membrane translocator                                      |
| 8.7 | up | Cbei_1750 | glutamine amidotransferase of anthranilatesynthase               |
| 8.8 | up | Cbei_1212 | "peptidase S14, ClpP"                                            |
| 8.9 | up | Cbei_3916 | major facilitator superfamily transporter                        |
| 9   | up | Cbei_3591 | lysyl-tRNA synthetase                                            |
| 9   | up | Cbei_0788 | amino acid permease-associated protein                           |
| 9.1 | up | Cbei_2094 | multidrug ABC transporter                                        |
| 9.2 | up | Cbei_3813 | PTS system lactose/cellobiose family transportersubunit IIC      |
| 9.2 | up | Cbei_4545 | sugar transporter                                                |
| 9.5 | up | Cbei_0444 | glutamine synthetase                                             |
| 9.5 | up | Cbei_0214 | 3-isopropylmalate dehydratase large subunit                      |
| 9.5 | up | Cbei_1951 | hypothetical protein                                             |
| 9.7 | up | Cbei_4932 | binding-protein-dependent transport system innermembrane protein |
| 9.8 | up | Cbei_0391 | peptidoglycan-binding LysM                                       |
| 9.8 | up | Cbei_4221 | cell wall binding repeat-containing protein                      |
| 10  | up | Cbei_4433 | ABC transporter                                                  |
| 10  | up | Cbei_5032 | metal dependent phosphohydrolase                                 |
| 10  | up | Cbei_1303 | hypothetical protein                                             |
| 11  | up | Cbei_3326 | hypothetical protein                                             |
| 11  | up | Cbei_2344 | hypothetical protein                                             |
| 11  | up | Cbei_4349 | polar amino acid ABC transporter inner membranesubunit           |
| 11  | up | Cbei_5059 | methyl-accepting chemotaxis sensory transducer                   |
| 11  | up | Cbei_5042 | extracellular ligand-binding receptor                            |
| 12  | up | Cbei_1524 | sodium:dicarboxylate symporter                                   |
| 12  | up | Cbei_0971 | CopY family transcriptional regulator                            |
| 12  | up | Cbei_4931 | binding-protein-dependent transport system innermembrane protein |
| 12  | up | Cbei_4930 | peptide ABC transporter ATPase                                   |
| 12  | up | Cbei_4928 | extracellular solute-binding protein                             |
| 13  | up | Cbei_4693 | hypothetical protein                                             |
| 13  | up | Cbei_1993 | TOBE domain-containing protein                                   |
| 13  | up | Cbei_1444 | alpha amylase                                                    |
| 14  | up | Cbei_4346 | succinylglutamate desuccinylase/aspartoacylase                   |
| 14  | up | Cbei_4687 | phage infection protein                                          |
| 14  | up | Cbei_3037 | ATP-dependent metalloprotease FtsH                               |
| 14  | up | Cbei_4347 | 4-aminobutyrate aminotransferase                                 |
| 14  | up | Cbei_2097 | acyl-protein synthetase LuxE                                     |
| 15  | up | Cbei_3036 | cell wall binding repeat-containing protein                      |
| 16  | up | Cbei_4929 | peptide ABC transporter ATPase                                   |
| 16  | up | Cbei_0212 | acetolactate synthase small subunit                              |

---

|     |    |           |                                                                  |
|-----|----|-----------|------------------------------------------------------------------|
| 16  | up | Cbei_1949 | hypothetical protein                                             |
| 17  | up | Cbei_4345 | succinylglutamate desuccinylase/aspartoacylase                   |
| 17  | up | Cbei_2343 | AsnC family transcriptional regulator                            |
| 17  | up | Cbei_1241 | hypothetical protein                                             |
| 18  | up | Cbei_0652 | tryptophan transport protein                                     |
| 20  | up | Cbei_2103 | acetyl-CoA hydrolase/transferase                                 |
| 20  | up | Cbei_0213 | alpha-isopropylmalate/homocitrate synthasefamily transferase     |
| 21  | up | Cbei_2390 | GntR family transcriptional regulator                            |
| 21  | up | Cbei_2758 | alanine racemase                                                 |
| 27  | up | Cbei_3878 | extracellular solute-binding protein                             |
| 29  | up | Cbei_0795 | 4Fe-4S ferredoxin                                                |
| 29  | up | Cbei_3876 | ribokinase-like domain-containing protein                        |
| 29  | up | Cbei_4352 | nitrilase/cyanide hydratase and apolipoproteinN-acyltransferase  |
| 32  | up | Cbei_2754 | "acetyl-CoA carboxylase, biotin carboxylase"                     |
| 33  | up | Cbei_4171 | polar amino acid ABC transporter inner membranesubunit           |
| 33  | up | Cbei_4173 | ABC transporter                                                  |
| 35  | up | Cbei_2011 | isopropylmalate/homocitrate/citramalatesynthase-like protein     |
| 36  | up | Cbei_0794 | nicotinate-nucleotide pyrophosphorylase                          |
| 36  | up | Cbei_1939 | binding-protein-dependent transport system innermembrane protein |
| 38  | up | Cbei_2391 | extracellular solute-binding protein                             |
| 41  | up | Cbei_2012 | homocitrate synthase                                             |
| 42  | up | Cbei_5034 | ammonium transporter                                             |
| 42  | up | Cbei_2003 | nitrogenase molybdenum-iron protein subunitbeta                  |
| 43  | up | Cbei_1598 | RpiR family transcriptional regulator                            |
| 43  | up | Cbei_4934 | putrescine--2-oxoglutarate aminotransferase                      |
| 44  | up | Cbei_4008 | malate dehydrogenase                                             |
| 44  | up | Cbei_2342 | aspartate ammonia-lyase                                          |
| 47  | up | Cbei_0306 | ATPase P                                                         |
| 48  | up | Cbei_2104 | beta-lactamase domain-containing protein                         |
| 48  | up | Cbei_4007 | 2-keto-3-deoxygluconate permease                                 |
| 51  | up | Cbei_2001 | nitrogen regulatory protein P-II                                 |
| 55  | up | Cbei_4170 | polar amino acid ABC transporter inner membranesubunit           |
| 56  | up | Cbei_4172 | extracellular solute-binding protein                             |
| 56  | up | Cbei_4350 | extracellular solute-binding protein                             |
| 56  | up | Cbei_4351 | ABC transporter                                                  |
| 64  | up | Cbei_1942 | dihydropyrimidinase                                              |
| 75  | up | Cbei_1998 | hypothetical protein                                             |
| 85  | up | Cbei_1404 | hypothetical protein                                             |
| 105 | up | Cbei_1997 | hypothetical protein                                             |
| 109 | up | Cbei_1936 | class III aminotransferase                                       |
| 109 | up | Cbei_2000 | nitrogen regulatory protein P-II                                 |
| 112 | up | Cbei_1941 | NMT1/THI5-like protein                                           |
| 115 | up | Cbei_2100 | vinylacetyl-CoA Delta-isomerase                                  |
| 124 | up | Cbei_2757 | allophanate hydrolase subunit 1                                  |
| 126 | up | Cbei_2755 | biotin/lipoyl attachment domain-containingprotein                |
| 126 | up | Cbei_2763 | AsnC family transcriptional regulator                            |
| 128 | up | Cbei_2759 | LamB/YcsF family protein                                         |

---

---

|     |      |           |                                                                  |
|-----|------|-----------|------------------------------------------------------------------|
| 130 | up   | Cbei_4942 | nitrogen regulatory protein P-II                                 |
| 144 | up   | Cbei_0792 | quinolinate synthetase                                           |
| 144 | up   | Cbei_2761 | hypothetical protein                                             |
| 147 | up   | Cbei_4940 | spermidine/putrescine ABC transporter ATPase                     |
| 158 | up   | Cbei_4941 | extracellular solute-binding protein                             |
| 160 | up   | Cbei_1937 | iron-containing alcohol dehydrogenase                            |
| 161 | up   | Cbei_2006 | "ferredoxin, 2Fe-2S"                                             |
| 161 | up   | Cbei_2767 | inner-membrane translocator                                      |
| 165 | up   | Cbei_4936 | aldehyde dehydrogenase                                           |
| 166 | up   | Cbei_2102 | hypothetical protein                                             |
| 166 | up   | Cbei_1938 | ABC transporter                                                  |
| 187 | up   | Cbei_1944 | allantoate amidohydrolase                                        |
| 197 | up   | Cbei_2762 | class IV aminotransferase                                        |
| 197 | up   | Cbei_2756 | urea amidolyase-like protein                                     |
| 224 | up   | Cbei_1943 | dihydropyrimidine dehydrogenase                                  |
| 233 | up   | Cbei_2760 | hypothetical protein                                             |
| 235 | up   | Cbei_1999 | nitrogenase iron protein                                         |
| 246 | up   | Cbei_2765 | ABC transporter                                                  |
| 275 | up   | Cbei_2768 | inner-membrane translocator                                      |
| 325 | up   | Cbei_1940 | binding-protein-dependent transport system innermembrane protein |
| 368 | up   | Cbei_2769 | extracellular ligand-binding receptor                            |
|     |      |           |                                                                  |
| 4.5 | down | Cbei_2659 | pseudouridine synthase                                           |
| 4.5 | down | Cbei_2610 | 3-methyl-2-oxobutanoatehydroxymethyltransferase                  |
| 4.5 | down | Cbei_0377 | DNA-binding/iron metalloprotein/AP endonuclease                  |
| 4.5 | down | Cbei_0278 | MarR family transcriptional regulator                            |
| 4.5 | down | Cbei_1636 | hypothetical protein                                             |
| 4.5 | down | Cbei_1405 | hypothetical protein                                             |
| 4.5 | down | Cbei_0195 | ribonucleotide-diphosphate reductase subunitbeta                 |
| 4.5 | down | Cbei_0378 | hypothetical protein                                             |
| 4.6 | down | Cbei_3371 | gluconate 5-dehydrogenase                                        |
| 4.6 | down | Cbei_0419 | ATP synthase F1 subunit epsilon                                  |
| 4.6 | down | Cbei_2881 | aldo/keto reductase                                              |
| 4.7 | down | Cbei_0329 | chaperonin GroEL                                                 |
| 4.7 | down | Cbei_5074 | adenylosuccinate synthetase                                      |
| 4.7 | down | Cbei_0200 | hypothetical protein                                             |
| 4.7 | down | Cbei_0285 | glycogen/starch/alpha-glucan phosphorylase                       |
| 4.7 | down | Cbei_4440 | hypothetical protein                                             |
| 4.8 | down | Cbei_3105 | dihydrouridine synthase                                          |
| 4.8 | down | Cbei_3616 | XRE family transcriptional regulator                             |
| 4.8 | down | Cbei_0201 | hypothetical protein                                             |
| 4.9 | down | Cbei_1311 | NAD-binding 6-phosphogluconate dehydrogenase                     |
| 4.9 | down | Cbei_3912 | VanZ family protein                                              |
| 4.9 | down | Cbei_0657 | type 11 methyltransferase                                        |
| 5   | down | Cbei_4877 | hypothetical protein                                             |
| 5   | down | Cbei_3739 | metallophosphoesterase                                           |
| 5   | down | Cbei_3687 | hypothetical protein                                             |

---

---

|     |      |           |                                                |
|-----|------|-----------|------------------------------------------------|
| 5.1 | down | Cbei_2844 | ABC transporter                                |
| 5.1 | down | Cbei_3565 | two component transcriptional regulator        |
| 5.1 | down | Cbei_3627 | hypothetical protein                           |
| 5.1 | down | Cbei_0029 | carbamoyl phosphate synthase large subunit     |
| 5.2 | down | Cbei_1634 | hypothetical protein                           |
| 5.2 | down | Cbei_3550 | hypothetical protein                           |
| 5.2 | down | Cbei_3289 | hypothetical protein                           |
| 5.2 | down | Cbei_0412 | F0F1 ATP synthase subunit A                    |
| 5.2 | down | Cbei_1127 | phosphate binding protein                      |
| 5.2 | down | Cbei_2951 | two component transcriptional regulator        |
| 5.2 | down | Cbei_1761 | hypothetical protein                           |
| 5.3 | down | Cbei_0087 | peptidyl-prolyl isomerase                      |
| 5.3 | down | Cbei_4704 | glycoside hydrolase                            |
| 5.3 | down | Cbei_1646 | hypothetical protein                           |
| 5.4 | down | Cbei_3688 | hypothetical protein                           |
| 5.4 | down | Cbei_4593 | hypothetical protein                           |
| 5.5 | down | Cbei_4771 | hypothetical protein                           |
| 5.5 | down | Cbei_3628 | DNA binding domain-containing protein          |
| 5.5 | down | Cbei_1648 | hypothetical protein                           |
| 5.5 | down | Cbei_3365 | cell cycle protein                             |
| 5.5 | down | Cbei_1819 | membrane-spanning protein                      |
| 5.6 | down | Cbei_2484 | two component transcriptional regulator        |
| 5.7 | down | Cbei_2997 | hypothetical protein                           |
| 5.7 | down | Cbei_0416 | F0F1 ATP synthase subunit alpha                |
| 5.7 | down | Cbei_4842 | xylose isomerase domain-containing protein     |
| 5.7 | down | Cbei_1430 | hypothetical protein                           |
| 5.7 | down | Cbei_2049 | ABC transporter                                |
| 5.7 | down | Cbei_3567 | UBA/Ts-N domain-containing protein             |
| 5.8 | down | Cbei_4843 | oxidoreductase domain-containing protein       |
| 5.9 | down | Cbei_4714 | hypothetical protein                           |
| 6   | down | Cbei_4124 | methyl-accepting chemotaxis sensory transducer |
| 6   | down | Cbei_0346 | nitroreductase                                 |
| 6   | down | Cbei_0413 | F0F1 ATP synthase subunit C                    |
| 6.1 | down | Cbei_1435 | heavy metal transport/detoxification protein   |
| 6.2 | down | Cbei_0281 | hypothetical protein                           |
| 6.2 | down | Cbei_4619 | oxidoreductase domain-containing protein       |
| 6.3 | down | Cbei_2291 | hypothetical protein                           |
| 6.3 | down | Cbei_2419 | polyphosphate kinase                           |
| 6.3 | down | Cbei_2971 | NLP/P60 protein                                |
| 6.3 | down | Cbei_0417 | F0F1 ATP synthase subunit gamma                |
| 6.3 | down | Cbei_0418 | F0F1 ATP synthase subunit beta                 |
| 6.3 | down | Cbei_4523 | nitroreductase                                 |
| 6.4 | down | Cbei_3555 | hypothetical protein                           |
| 6.5 | down | Cbei_0076 | asparaginyl-tRNA synthetase                    |
| 6.5 | down | Cbei_2571 | hypothetical protein                           |
| 6.8 | down | Cbei_3535 | hypothetical protein                           |
| 6.9 | down | Cbei_3695 | cobalt transport protein CbiM                  |
| 6.9 | down | Cbei_3549 | XRE family transcriptional regulator           |

---

---

|     |      |           |                                                         |
|-----|------|-----------|---------------------------------------------------------|
| 7   | down | Cbei_0379 | 2-alkenal reductase                                     |
| 7   | down | Cbei_4620 | sugar transferase                                       |
| 7.1 | down | Cbei_1516 | ABC transporter                                         |
| 7.2 | down | Cbei_4618 | UTP-glucose-1-phosphate uridylyltransferase             |
| 7.2 | down | Cbei_2482 | hypothetical protein                                    |
| 7.2 | down | Cbei_4439 | thiamine biosynthesis protein ThiH                      |
| 7.3 | down | Cbei_3303 | diguanylate cyclase/phosphodiesterase                   |
| 7.3 | down | Cbei_3557 | TROVE domain-containing protein                         |
| 7.4 | down | Cbei_3106 | heat shock protein DnaJ domain-containing protein       |
| 7.4 | down | Cbei_3556 | hypothetical protein                                    |
| 7.4 | down | Cbei_2670 | hypothetical protein                                    |
| 7.5 | down | Cbei_3623 | hypothetical protein                                    |
| 7.5 | down | Cbei_3575 | hypothetical protein                                    |
| 7.6 | down | Cbei_1494 | hypothetical protein                                    |
| 7.7 | down | Cbei_2135 | peroxiredoxin                                           |
| 7.8 | down | Cbei_4090 | N-acetyltransferase GCN5                                |
| 7.8 | down | Cbei_2026 | hypothetical protein                                    |
| 7.9 | down | Cbei_1460 | hypothetical protein                                    |
| 7.9 | down | Cbei_2433 | hypothetical protein                                    |
| 7.9 | down | Cbei_3323 | antibiotic transport-associated permease SpaG/MutG      |
| 8   | down | Cbei_4717 | cell wall binding repeat-containing protein             |
| 8.3 | down | Cbei_2998 | hypothetical protein                                    |
| 8.5 | down | Cbei_0331 | inosine 5'-monophosphate dehydrogenase                  |
| 8.5 | down | Cbei_2320 | PTS system trehalose-specific transporters subunit IIBC |
| 8.5 | down | Cbei_2701 | cell wall binding repeat-containing protein             |
| 8.7 | down | Cbei_1729 | glycosyl transferase family protein                     |
| 8.7 | down | Cbei_3286 | hypothetical protein                                    |
| 8.9 | down | Cbei_0328 | co-chaperonin GroES                                     |
| 9.2 | down | Cbei_3693 | cobalt ABC transporter ATPase                           |
| 9.2 | down | Cbei_3354 | NADPH-dependent FMN reductase                           |
| 9.3 | down | Cbei_2882 | hypothetical protein                                    |
| 9.9 | down | Cbei_3568 | hypothetical protein                                    |
| 10  | down | Cbei_2290 | hypothetical protein                                    |
| 10  | down | Cbei_2967 | hypothetical protein                                    |
| 10  | down | Cbei_0028 | carbamoyl phosphate synthase small subunit              |
| 11  | down | Cbei_2446 | ornithine carbamoyltransferase                          |
| 11  | down | Cbei_3694 | cobalt ABC transporter permease                         |
| 11  | down | Cbei_4669 | glycoside hydrolase                                     |
| 11  | down | Cbei_2483 | hypothetical protein                                    |
| 12  | down | Cbei_2946 | hypothetical protein                                    |
| 12  | down | Cbei_3649 | MarR family transcriptional regulator                   |
| 13  | down | Cbei_3973 | MerR family transcriptional regulator                   |
| 13  | down | Cbei_4113 | alanine racemase                                        |
| 13  | down | Cbei_4521 | ornithine carbamoyltransferase                          |
| 13  | down | Cbei_1809 | hypothetical protein                                    |
| 13  | down | Cbei_2873 | polysaccharide deacetylase                              |
| 14  | down | Cbei_4103 | two component transcriptional regulator                 |
| 14  | down | Cbei_3569 | RNA polymerase factor sigma-70                          |

---



---

|     |      |           |                                                                      |
|-----|------|-----------|----------------------------------------------------------------------|
| 15  | down | Cbei_3576 | RNA polymerase factor sigma-70                                       |
| 15  | down | Cbei_3536 | ArsR family transcriptional regulator                                |
| 16  | down | Cbei_1425 | permease                                                             |
| 17  | down | Cbei_4515 | argininosuccinate synthase                                           |
| 18  | down | Cbei_3763 | periplasmic binding protein                                          |
| 18  | down | Cbei_2981 | hypothetical protein                                                 |
| 18  | down | Cbei_1820 | hypothetical protein                                                 |
| 18  | down | Cbei_4517 | N-acetyl-gamma-glutamyl-phosphate reductase                          |
| 18  | down | Cbei_4520 | acetylornithine and succinylornithineaminotransferase                |
| 19  | down | Cbei_3975 | cell wall binding repeat-containing protein                          |
| 19  | down | Cbei_3974 | aldo/keto reductase                                                  |
| 19  | down | Cbei_4519 | acetylglutamate kinase                                               |
| 20  | down | Cbei_1309 | sodium:dicarboxylate symporter                                       |
| 20  | down | Cbei_4623 | cell wall binding repeat-containing protein                          |
| 22  | down | Cbei_1728 | hypothetical protein                                                 |
| 24  | down | Cbei_4516 | argininosuccinate lyase                                              |
| 25  | down | Cbei_4518 | bifunctional ornithineacetyltransferase/N-acetylglutamate synthase   |
| 26  | down | Cbei_1806 | hypothetical protein                                                 |
| 29  | down | Cbei_1808 | ABC transporter                                                      |
| 32  | down | Cbei_1807 | secretion protein HlyD family protein                                |
| 33  | down | Cbei_1308 | "UDP-N-acetylmuramoylalanyl-D-glutamate--2,6-diaminopimelate ligase" |
| 37  | down | Cbei_3325 | ABC transporter                                                      |
| 50  | down | Cbei_0538 | hypothetical protein                                                 |
| 57  | down | Cbei_1436 | peptidase S8/S53 subtilisin kexin sedolisin                          |
| 61  | down | Cbei_1725 | glycosyl transferase family protein                                  |
| 67  | down | Cbei_1726 | hypothetical protein                                                 |
| 77  | down | Cbei_2445 | hypothetical protein                                                 |
| 84  | down | Cbei_1138 | hypothetical protein                                                 |
| 98  | down | Cbei_1724 | glycosyl transferase family protein                                  |
| 117 | down | Cbei_2188 | hypothetical protein                                                 |

---

Table S4B. Genes differentially expressed by more than 5 folds in DG-8052 in P2 medium with CaCO<sub>3</sub> vs DG-8052 in P2 medium during solventogenesis.

| Fold Change | up/down | Gene Symbol | Gene Product                                                     |
|-------------|---------|-------------|------------------------------------------------------------------|
| 4.5         | up      | Cbei_0747   | BNR repeat-containing glycosyl hydrolase                         |
| 4.5         | up      | Cbei_4049   | hypothetical protein                                             |
| 4.5         | up      | Cbei_2864   | RND family efflux transporter MFP subunit                        |
| 4.5         | up      | Cbei_1135   | NAD(P)H-dependent glycerol-3-phosphatedehydrogenase              |
| 4.5         | up      | Cbei_0460   | 2-deoxy-D-gluconate 3-dehydrogenase                              |
| 4.5         | up      | Cbei_1462   | hypothetical protein                                             |
| 4.5         | up      | Cbei_4009   | hypothetical protein                                             |
| 4.5         | up      | Cbei_3180   | short-chain dehydrogenase/reductase SDR                          |
| 4.5         | up      | Cbei_4341   | hypothetical protein                                             |
| 4.5         | up      | Cbei_3825   | ABC transporter permease                                         |
| 4.5         | up      | Cbei_3597   | flavin reductase domain-containing protein                       |
| 4.5         | up      | Cbei_3103   | "peptidase M56, BlaR1"                                           |
| 4.5         | up      | Cbei_1502   | carboxymuconolactone decarboxylase                               |
| 4.6         | up      | Cbei_4127   | dihydroxy-acid dehydratase                                       |
| 4.6         | up      | Cbei_0707   | major facilitator superfamily transporter                        |
| 4.6         | up      | Cbei_0238   | hypothetical protein                                             |
| 4.6         | up      | Cbei_0296   | hypothetical protein                                             |
| 4.6         | up      | Cbei_0391   | peptidoglycan-binding LysM                                       |
| 4.7         | up      | Cbei_3027   | PadR-like family transcriptional regulator                       |
| 4.7         | up      | Cbei_1949   | hypothetical protein                                             |
| 4.7         | up      | Cbei_2040   | coenzyme A transferase                                           |
| 4.7         | up      | Cbei_2880   | NAD-dependent epimerase/dehydratase                              |
| 4.7         | up      | Cbei_4179   | auxin efflux carrier                                             |
| 4.7         | up      | Cbei_1762   | extracellular ligand-binding receptor                            |
| 4.7         | up      | Cbei_0555   | signal transduction histidine kinase LytS                        |
| 4.7         | up      | Cbei_2409   | hypothetical protein                                             |
| 4.7         | up      | Cbei_4190   | sulfate ABC transporter ATPase                                   |
| 4.7         | up      | Cbei_4012   | methyl-accepting chemotaxis sensory transducer                   |
| 4.7         | up      | Cbei_3818   | sensory histidine kinase AtoS                                    |
| 4.8         | up      | Cbei_4573   | chorismate mutase                                                |
| 4.8         | up      | Cbei_2925   | DEAD/DEAH box helicase                                           |
| 4.8         | up      | Cbei_2737   | leucyl aminopeptidase                                            |
| 4.8         | up      | Cbei_2193   | D-isomer specific 2-hydroxyacid dehydrogenaseNAD-binding subunit |
| 4.8         | up      | Cbei_5050   | membrane-bound proton-translocatingpyrophosphatase               |
| 4.8         | up      | Cbei_2518   | aldehyde dehydrogenase                                           |
| 4.8         | up      | Cbei_0214   | 3-isopropylmalate dehydratase large subunit                      |
| 4.9         | up      | Cbei_2093   | multidrug ABC transporter ATPase                                 |
| 4.9         | up      | Cbei_0447   | 5-keto-4-deoxyuronate isomerase                                  |
| 4.9         | up      | Cbei_1766   | ABC transporter                                                  |
| 4.9         | up      | Cbei_2494   | D-galactose-binding protein                                      |
| 4.9         | up      | Cbei_3182   | alpha/beta fold family hydrolase                                 |

|     |    |           |                                                                   |
|-----|----|-----------|-------------------------------------------------------------------|
| 4.9 | up | Cbei_3543 | O-acetylhomoserineaminocarboxypropyltransferase                   |
| 5   | up | Cbei_2378 | signal transduction histidine kinase LytS                         |
| 5   | up | Cbei_4217 | type II secretion system protein                                  |
| 5   | up | Cbei_0830 | molecular chaperone DnaK                                          |
| 5   | up | Cbei_0258 | ---                                                               |
| 5   | up | Cbei_4527 | amino acid permease-associated protein                            |
| 5   | up | Cbei_3880 | binding-protein-dependent transport system innermembrane protein  |
| 5   | up | Cbei_0705 | pyruvate formate-lyase                                            |
| 5.1 | up | Cbei_3574 | hypothetical protein                                              |
| 5.1 | up | Cbei_3544 | 4Fe-4S ferredoxin                                                 |
| 5.1 | up | Cbei_5024 | alpha/beta fold family hydrolase                                  |
| 5.1 | up | Cbei_4468 | GntR family transcriptional regulator                             |
| 5.1 | up | Cbei_2203 | hypothetical protein                                              |
| 5.1 | up | Cbei_3892 | hypothetical protein                                              |
| 5.1 | up | Cbei_2077 | amidase                                                           |
| 5.1 | up | Cbei_1109 | beta-lactamase domain-containing protein                          |
| 5.1 | up | Cbei_3451 | transposase-like protein (20)                                     |
| 5.2 | up | Cbei_3287 | ---                                                               |
| 5.2 | up | Cbei_1045 | hypothetical protein                                              |
| 5.2 | up | Cbei_0231 | binding-protein-dependent transport system innermembrane protein  |
| 5.2 | up | Cbei_3630 | acetyl-CoA acetyltransferase                                      |
| 5.2 | up | Cbei_2361 | ArsR family transcriptional regulator                             |
| 5.2 | up | Cbei_3587 | 4Fe-4S ferredoxin                                                 |
| 5.3 | up | Cbei_2075 | NUDIX hydrolase                                                   |
| 5.3 | up | Cbei_4082 | glucuronate isomerase                                             |
| 5.3 | up | Cbei_4641 | sigma-54 factor interaction domain-containingprotein              |
| 5.3 | up | Cbei_2196 | PTS system mannose/fructose/sorbose familytransporter subunit IID |
| 5.3 | up | Cbei_4550 | ribokinase-like domain-containing protein                         |
| 5.3 | up | Cbei_1483 | hypothetical protein                                              |
| 5.3 | up | Cbei_3133 | LysR family transcriptional regulator                             |
| 5.3 | up | Cbei_4549 | myo-inositol catabolism IolB domain-containingprotein             |
| 5.4 | up | Cbei_0390 | hypothetical protein                                              |
| 5.4 | up | Cbei_0448 | 2-deoxy-D-gluconate 3-dehydrogenase                               |
| 5.4 | up | Cbei_4455 | L-ribulose-5-phosphate 4-epimerase                                |
| 5.4 | up | Cbei_2390 | GntR family transcriptional regulator                             |
| 5.4 | up | Cbei_2840 | extradiol ring-cleavage dioxygenase III subunitB                  |
| 5.4 | up | Cbei_4679 | binding-protein-dependent transport system innermembrane protein  |
| 5.4 | up | Cbei_3459 | 4Fe-4S ferredoxin                                                 |
| 5.5 | up | Cbei_4083 | mannitol dehydrogenase domain-containingprotein                   |
| 5.5 | up | Cbei_2571 | hypothetical protein                                              |
| 5.5 | up | Cbei_2852 | isochorismatase hydrolase                                         |

|     |    |           |                                                                        |
|-----|----|-----------|------------------------------------------------------------------------|
| 5.5 | up | Cbei_2853 | major facilitator superfamily transporter                              |
| 5.5 | up | Cbei_2569 | DNA mismatch repair protein MutS                                       |
| 5.5 | up | Cbei_2345 | "small acid-soluble spore protein, alpha/betatype"                     |
| 5.6 | up | Cbei_2094 | multidrug ABC transporter                                              |
| 5.6 | up | Cbei_2777 | beta-lactamase domain-containing protein                               |
| 5.6 | up | Cbei_4923 | MarR family transcriptional regulator                                  |
| 5.6 | up | Cbei_2197 | PTS system sorbose subfamily transporter subunitIIB                    |
| 5.6 | up | Cbei_1919 | hypothetical protein                                                   |
| 5.6 | up | Cbei_3222 | hypothetical protein                                                   |
| 5.6 | up | Cbei_1763 | inner-membrane translocator                                            |
| 5.7 | up | Cbei_4681 | L-fucose isomerase-like protein                                        |
| 5.7 | up | Cbei_4451 | hypothetical protein                                                   |
| 5.7 | up | Cbei_2528 | hypothetical protein                                                   |
| 5.7 | up | Cbei_4191 | sulfate ABC transporter permease                                       |
| 5.8 | up | Cbei_1918 | "phosphotransferase system, EIIC"                                      |
| 5.8 | up | Cbei_0452 | L-rhamnose 1-epimerase                                                 |
| 5.8 | up | Cbei_1764 | inner-membrane translocator                                            |
| 5.8 | up | Cbei_4183 | chemotaxis protein CheA                                                |
| 5.8 | up | Cbei_1447 | "small acid-soluble spore protein, alpha/betatype"                     |
| 5.8 | up | Cbei_3264 | "small acid-soluble spore protein, alpha/betatype"                     |
| 5.8 | up | Cbei_3920 | galactoside ABC transporter                                            |
| 5.9 | up | Cbei_1593 | OmpA/MotB domain-containing protein                                    |
| 5.9 | up | Cbei_3562 | transposase IS116/IS110/IS902 family protein                           |
| 5.9 | up | Cbei_1765 | ABC transporter                                                        |
| 5.9 | up | Cbei_2348 | hypothetical protein                                                   |
| 5.9 | up | Cbei_3223 | hypothetical protein                                                   |
| 6   | up | Cbei_2389 | L-fucose isomerase-like protein                                        |
| 6   | up | Cbei_2838 | MarR family transcriptional regulator                                  |
| 6   | up | Cbei_0971 | CopY family transcriptional regulator                                  |
| 6   | up | Cbei_3483 | XRE family transcriptional regulator                                   |
| 6   | up | Cbei_3069 | rubrerythrin                                                           |
| 6.1 | up | Cbei_1361 | hypothetical protein                                                   |
| 6.1 | up | Cbei_4361 | radical SAM domain-containing protein                                  |
| 6.1 | up | Cbei_2738 | transcriptional antiterminator BglG                                    |
| 6.2 | up | Cbei_3028 | major facilitator superfamily transporter                              |
| 6.2 | up | Cbei_2440 | hypothetical protein                                                   |
| 6.2 | up | Cbei_2439 | cytochrome b5                                                          |
| 6.2 | up | Cbei_1853 | pyruvate flavodoxin/ferredoxin oxidoreductasedomain-containing protein |
| 6.2 | up | Cbei_2078 | nicotinate phosphoribosyltransferase                                   |
| 6.3 | up | Cbei_4193 | sulfate ABC transporter substrate-bindingprotein                       |
| 6.3 | up | Cbei_1081 | ABC transporter                                                        |
| 6.3 | up | Cbei_0748 | deoxyribose-phosphate aldolase                                         |
| 6.3 | up | Cbei_2110 | arsenite-activated ATPase ArsA                                         |
| 6.3 | up | Cbei_2214 | ---                                                                    |
| 6.3 | up | Cbei_2321 | "alpha,alpha-phosphotrehalase"                                         |
| 6.3 | up | Cbei_3659 | NAD-dependent epimerase/dehydratase                                    |
| 6.3 | up | Cbei_2458 | 5-keto-4-deoxyuronate isomerase                                        |

|     |    |           |                                                              |
|-----|----|-----------|--------------------------------------------------------------|
| 6.4 | up | Cbei_2377 | periplasmic binding protein/LacI transcriptional regulator   |
| 6.4 | up | Cbei_2092 | transcriptional regulator TrmB                               |
| 6.4 | up | Cbei_3448 | hypothetical protein                                         |
| 6.4 | up | Cbei_1254 | ATP-dependent protease La                                    |
| 6.4 | up | Cbei_3810 | ROK family protein                                           |
| 6.5 | up | Cbei_2199 | PTS system fructose subfamily transportersubunit IIA         |
| 6.5 | up | Cbei_5025 | integral membrane sensor signal transductionhistidine kinase |
| 6.6 | up | Cbei_1128 | phosphate ABC transporter permease                           |
| 6.6 | up | Cbei_4930 | peptide ABC transporter ATPase                               |
| 6.6 | up | Cbei_2921 | EmrB/QacA family drug resistance transporter                 |
| 6.7 | up | Cbei_3600 | 4Fe-4S ferredoxin                                            |
| 6.7 | up | Cbei_3478 | hypothetical protein                                         |
| 6.7 | up | Cbei_2076 | ribose-phosphate pyrophosphokinase                           |
| 6.7 | up | Cbei_5023 | hypothetical protein                                         |
| 6.7 | up | Cbei_1767 | extracellular ligand-binding receptor                        |
| 6.8 | up | Cbei_3368 | cupin                                                        |
| 6.8 | up | Cbei_1360 | hypothetical protein                                         |
| 6.9 | up | Cbei_2386 | transaldolase                                                |
| 6.9 | up | Cbei_1047 | hypothetical protein                                         |
| 6.9 | up | Cbei_2680 | redoxin domain-containing protein                            |
| 6.9 | up | Cbei_0389 | glutathione peroxidase                                       |
| 7   | up | Cbei_2200 | mannonate dehydratase                                        |
| 7   | up | Cbei_2706 | peptidase M24                                                |
| 7   | up | Cbei_2079 | ---                                                          |
| 7   | up | Cbei_2115 | DNA mismatch repair protein MutSdomain-containing protein    |
| 7   | up | Cbei_1749 | anthranilate synthase component I                            |
| 7.1 | up | Cbei_4016 | histidine kinase                                             |
| 7.1 | up | Cbei_2568 | pentapeptide repeat-containing protein                       |
| 7.2 | up | Cbei_2111 | protein tyrosine phosphatase                                 |
| 7.2 | up | Cbei_4674 | glycoside hydrolase family protein                           |
| 7.2 | up | Cbei_0257 | malonyl CoA-acyl carrier protein transacylase                |
| 7.2 | up | Cbei_1755 | tryptophan synthase subunit alpha                            |
| 7.4 | up | Cbei_4505 | cell wall binding repeat-containing protein                  |
| 7.4 | up | Cbei_1065 | hypothetical protein                                         |
| 7.4 | up | Cbei_2001 | nitrogen regulatory protein P-II                             |
| 7.4 | up | Cbei_2932 | pH-dependent sodium/proton antiporter                        |
| 7.4 | up | Cbei_0215 | 3-isopropylmalate dehydratase small subunit                  |
| 7.7 | up | Cbei_0749 | RpiR family transcriptional regulator                        |
| 7.7 | up | Cbei_3629 | hypothetical protein                                         |
| 7.7 | up | Cbei_2061 | ammonium transporter                                         |
| 7.8 | up | Cbei_3893 | MarR family transcriptional regulator                        |
| 7.8 | up | Cbei_3895 | NADPH-dependent FMN reductase                                |
| 7.8 | up | Cbei_2198 | hypothetical protein                                         |
| 7.9 | up | Cbei_2081 | hypothetical protein                                         |
| 7.9 | up | Cbei_3482 | peptide deformylase                                          |

|     |    |           |                                                                          |
|-----|----|-----------|--------------------------------------------------------------------------|
| 7.9 | up | Cbei_1011 | formate acetyltransferase                                                |
| 8   | up | Cbei_3153 | hypothetical protein                                                     |
| 8   | up | Cbei_1441 | binding-protein-dependent transport system innermembrane protein         |
| 8   | up | Cbei_0110 | "Mg <sup>2+</sup> transporter protein, CorA family protein"              |
| 8.1 | up | Cbei_2376 | isochorismatase hydrolase                                                |
| 8.1 | up | Cbei_4018 | CheW protein                                                             |
| 8.2 | up | Cbei_1375 | Ig domain-containing protein                                             |
| 8.2 | up | Cbei_0462 | 2-dehydro-3-deoxyphosphogluconate aldolase                               |
| 8.2 | up | Cbei_0659 | signal transduction histidine kinase regulatingcitrate/malate metabolism |
| 8.2 | up | Cbei_3814 | beta-glucosidase                                                         |
| 8.2 | up | Cbei_0722 | LysR family transcriptional regulator                                    |
| 8.2 | up | Cbei_1046 | hypothetical protein                                                     |
| 8.3 | up | Cbei_4454 | transaldolase                                                            |
| 8.3 | up | Cbei_0652 | tryptophan transport protein                                             |
| 8.3 | up | Cbei_4645 | transaldolase                                                            |
| 8.5 | up | Cbei_2524 | cof family hydrolase                                                     |
| 8.6 | up | Cbei_3367 | "sugar-specific permease, SgaT/UlaA"                                     |
| 8.6 | up | Cbei_2201 | 2-dehydro-3-deoxyphosphogluconate aldolase                               |
| 8.7 | up | Cbei_3095 | helix-turn-helix domain-containing protein                               |
| 8.7 | up | Cbei_2379 | response regulator receiver protein                                      |
| 8.7 | up | Cbei_4126 | alpha-N-arabinofuranosidase                                              |
| 8.7 | up | Cbei_4194 | sulfate ABC transporter substrate-bindingprotein                         |
| 8.8 | up | Cbei_3184 | RNA-directed DNA polymerase                                              |
| 8.8 | up | Cbei_1129 | phosphate ABC transporter permease                                       |
| 8.9 | up | Cbei_2082 | adenylosuccinate synthase                                                |
| 9   | up | Cbei_0794 | nicotinate-nucleotide pyrophosphorylase                                  |
| 9   | up | Cbei_1255 | hypothetical protein                                                     |
| 9.1 | up | Cbei_4508 | FAD dependent oxidoreductase                                             |
| 9.1 | up | Cbei_0739 | NADPH-dependent FMN reductase                                            |
| 9.1 | up | Cbei_2923 | secretion protein HlyD family protein                                    |
| 9.1 | up | Cbei_1751 | anthranilate phosphoribosyltransferase                                   |
| 9.1 | up | Cbei_5033 | nitrogen regulatory protein P-II                                         |
| 9.2 | up | Cbei_0461 | ribokinase-like domain-containing protein                                |
| 9.2 | up | Cbei_3812 | "phosphotransferase system,lactose/cellobiose-specific IIB subunit"      |
| 9.3 | up | Cbei_1750 | glutamine amidotransferase of anthranilatesynthase                       |
| 9.3 | up | Cbei_2113 | hypothetical protein                                                     |
| 9.3 | up | Cbei_0703 | hypothetical protein                                                     |
| 9.4 | up | Cbei_1752 | Indole-3-glycerol phosphate synthase                                     |
| 9.4 | up | Cbei_2213 | "peptidase M48, Ste24p"                                                  |
| 9.4 | up | Cbei_5032 | metal dependent phosphohydrolase                                         |
| 9.4 | up | Cbei_3477 | hypothetical protein                                                     |
| 9.4 | up | Cbei_3476 | ---                                                                      |
| 9.4 | up | Cbei_3811 | PTS system lactose/cellobiose-specifictransporter subunit IIA            |
| 9.5 | up | Cbei_2225 | "small acid-soluble spore protein, alpha/betatype"                       |

---

|     |    |           |                                                                     |
|-----|----|-----------|---------------------------------------------------------------------|
| 9.5 | up | Cbei_2041 | citrate transporter                                                 |
| 9.5 | up | Cbei_4347 | 4-aminobutyrate aminotransferase                                    |
| 9.6 | up | Cbei_2080 | hypothetical protein                                                |
| 9.8 | up | Cbei_4019 | chemotaxis protein CheA                                             |
| 9.8 | up | Cbei_0805 | phage infection protein                                             |
| 9.9 | up | Cbei_1459 | methyl-accepting chemotaxis sensory transducer                      |
| 10  | up | Cbei_3735 | XRE family transcriptional regulator                                |
| 10  | up | Cbei_1373 | phage integrase family protein                                      |
| 10  | up | Cbei_1446 | pH-dependent sodium/proton antiporter                               |
| 10  | up | Cbei_2263 | ---                                                                 |
| 11  | up | Cbei_4924 | major facilitator superfamily transporter                           |
| 11  | up | Cbei_3813 | PTS system lactose/cellobiose family<br>transportersubunit IIC      |
| 11  | up | Cbei_4450 | monosaccharide-transporting ATPase                                  |
| 11  | up | Cbei_4469 | SCP-like extracellular protein                                      |
| 11  | up | Cbei_4453 | transketolase                                                       |
| 11  | up | Cbei_1754 | tryptophan synthase subunit beta                                    |
| 11  | up | Cbei_4644 | transketolase                                                       |
| 11  | up | Cbei_2387 | transketolase                                                       |
| 11  | up | Cbei_3277 | class II aldolase/adducin family protein                            |
| 11  | up | Cbei_0532 | transketolase                                                       |
| 11  | up | Cbei_3733 | hypothetical protein                                                |
| 11  | up | Cbei_2357 | extracellular solute-binding protein                                |
| 11  | up | Cbei_4799 | sugar isomerase (SIS)                                               |
| 11  | up | Cbei_2000 | nitrogen regulatory protein P-II                                    |
| 11  | up | Cbei_1442 | binding-protein-dependent transport system<br>innermembrane protein |
| 11  | up | Cbei_3032 | hypothetical protein                                                |
| 12  | up | Cbei_1937 | iron-containing alcohol dehydrogenase                               |
| 12  | up | Cbei_2011 | isopropylmalate/homocitrate/citramalatesynthase-<br>like protein    |
| 12  | up | Cbei_0653 | polysaccharide deacetylase                                          |
| 12  | up | Cbei_0218 | ketol-acid reductoisomerase                                         |
| 12  | up | Cbei_2870 | glycine/betaine ABC transportersubstrate-binding<br>protein         |
| 12  | up | Cbei_4929 | peptide ABC transporter ATPase                                      |
| 13  | up | Cbei_4080 | histidine triad (HIT) protein                                       |
| 13  | up | Cbei_4675 | glycoside hydrolase                                                 |
| 13  | up | Cbei_1351 | hypothetical protein                                                |
| 13  | up | Cbei_3278 | coenzyme A transferase                                              |
| 13  | up | Cbei_0777 | glutathione peroxidase                                              |
| 13  | up | Cbei_3730 | hypothetical protein                                                |
| 13  | up | Cbei_4676 | response regulator receiver protein                                 |
| 13  | up | Cbei_3038 | "peptidase, membrane zinc metallopeptidase"                         |
| 14  | up | Cbei_0262 | ABC transporter                                                     |
| 14  | up | Cbei_4507 | FAD-dependent pyridine<br>nucleotide-disulfideoxidoreductase        |
| 14  | up | Cbei_4548 | "thiamine pyrophosphate protein, central region"                    |
| 14  | up | Cbei_3036 | cell wall binding repeat-containing protein                         |

---

---

|    |    |           |                                                                     |
|----|----|-----------|---------------------------------------------------------------------|
| 14 | up | Cbei_2839 | methyl-accepting chemotaxis sensory transducer                      |
| 14 | up | Cbei_4457 | L-arabinose isomerase                                               |
| 14 | up | Cbei_4350 | extracellular solute-binding protein                                |
| 14 | up | Cbei_3096 | ABC transporter                                                     |
| 14 | up | Cbei_0721 | phage replisome organizer                                           |
| 14 | up | Cbei_3734 | hypothetical protein                                                |
| 14 | up | Cbei_0216 | 3-isopropylmalate dehydrogenase                                     |
| 15 | up | Cbei_2754 | "acetyl-CoA carboxylase, biotin carboxylase"                        |
| 15 | up | Cbei_2083 | GntR family transcriptional regulator                               |
| 15 | up | Cbei_1063 | "peptidase M56, BlaR1"                                              |
| 15 | up | Cbei_1130 | phosphate ABC transporter ATPase                                    |
| 15 | up | Cbei_4772 | methyl-accepting chemotaxis sensory transducer                      |
| 15 | up | Cbei_1753 | phosphoribosylanthranilate isomerase                                |
| 15 | up | Cbei_0451 | oligogalacturonide transporter                                      |
| 15 | up | Cbei_4942 | nitrogen regulatory protein P-II                                    |
| 16 | up | Cbei_4173 | ABC transporter                                                     |
| 16 | up | Cbei_2871 | glycine/betaine ABC transporter ATPase                              |
| 16 | up | Cbei_3737 | NADPH-dependent FMN reductase                                       |
| 16 | up | Cbei_0738 | major facilitator superfamily transporter                           |
| 16 | up | Cbei_4547 | oxidoreductase domain-containing protein                            |
| 16 | up | Cbei_2112 | arsenical-resistance protein                                        |
| 16 | up | Cbei_4352 | nitrilase/cyanide hydratase and<br>apolipoproteinN-acyltransferase  |
| 16 | up | Cbei_4934 | putrescine--2-oxoglutarate aminotransferase                         |
| 16 | up | Cbei_1444 | alpha amylase                                                       |
| 16 | up | Cbei_2012 | homocitrate synthase                                                |
| 17 | up | Cbei_4506 | hypothetical protein                                                |
| 17 | up | Cbei_3037 | ATP-dependent metalloprotease FtsH                                  |
| 17 | up | Cbei_1131 | phosphate uptake regulator PhoU                                     |
| 17 | up | Cbei_4081 | oligogalacturonide transporter                                      |
| 17 | up | Cbei_0444 | glutamine synthetase                                                |
| 17 | up | Cbei_2358 | binding-protein-dependent transport system<br>innermembrane protein |
| 17 | up | Cbei_1443 | Alpha-glucosidase                                                   |
| 18 | up | Cbei_4928 | extracellular solute-binding protein                                |
| 18 | up | Cbei_2922 | secretion protein HlyD                                              |
| 18 | up | Cbei_0217 | acetolactate synthase large subunit                                 |
| 19 | up | Cbei_0260 | EmrB/QacA family drug resistance transporter                        |
| 19 | up | Cbei_3521 | hypothetical protein                                                |
| 20 | up | Cbei_1132 | phosphate uptake regulator PhoU                                     |
| 20 | up | Cbei_4452 | carbohydrate kinase FGGY                                            |
| 21 | up | Cbei_2570 | hypothetical protein                                                |
| 21 | up | Cbei_2459 | 2-keto-3-deoxygluconate permease                                    |
| 21 | up | Cbei_1833 | altronate oxidoreductase                                            |
| 21 | up | Cbei_4458 | histidine kinase internal region                                    |
| 22 | up | Cbei_3517 | ROK family protein                                                  |
| 23 | up | Cbei_4546 | xylose isomerase domain-containing protein                          |
| 23 | up | Cbei_4542 | acyl-CoA dehydrogenase<br>domain-containingprotein                  |

---



---

|    |    |           |                                                                        |
|----|----|-----------|------------------------------------------------------------------------|
| 23 | up | Cbei_1944 | allantoate amidohydrolase                                              |
| 23 | up | Cbei_2344 | hypothetical protein                                                   |
| 23 | up | Cbei_1998 | hypothetical protein                                                   |
| 24 | up | Cbei_0449 | glycosyl hydrolase family protein                                      |
| 25 | up | Cbei_2758 | alanine racemase                                                       |
| 25 | up | Cbei_4351 | ABC transporter                                                        |
| 26 | up | Cbei_0111 | amidohydrolase                                                         |
| 26 | up | Cbei_2359 | monosaccharide-transporting ATPase                                     |
| 26 | up | Cbei_2384 | xylulokinase                                                           |
| 27 | up | Cbei_4172 | extracellular solute-binding protein                                   |
| 27 | up | Cbei_3651 | major facilitator superfamily transporter                              |
| 27 | up | Cbei_2391 | extracellular solute-binding protein                                   |
| 27 | up | Cbei_2383 | xylose isomerase                                                       |
| 28 | up | Cbei_1999 | nitrogenase iron protein                                               |
| 29 | up | Cbei_1997 | hypothetical protein                                                   |
| 30 | up | Cbei_1832 | glucuronate isomerase                                                  |
| 30 | up | Cbei_1943 | dihydropyrimidine dehydrogenase                                        |
| 31 | up | Cbei_3731 | hypothetical protein                                                   |
| 31 | up | Cbei_0264 | hypothetical protein                                                   |
| 31 | up | Cbei_1941 | NMT1/THI5-like protein                                                 |
| 31 | up | Cbei_2006 | "ferredoxin, 2Fe-2S"                                                   |
| 32 | up | Cbei_4545 | sugar transporter                                                      |
| 32 | up | Cbei_2388 | hypothetical protein                                                   |
| 33 | up | Cbei_3876 | ribokinase-like domain-containing protein                              |
| 33 | up | Cbei_2003 | nitrogenase molybdenum-iron protein subunitbeta                        |
| 33 | up | Cbei_3185 | methionine--tRNA ligase                                                |
| 34 | up | Cbei_5034 | ammonium transporter                                                   |
| 34 | up | Cbei_3736 | major facilitator superfamily transporter                              |
| 35 | up | Cbei_0109 | sugar transporter                                                      |
| 35 | up | Cbei_0317 | transaldolase                                                          |
| 35 | up | Cbei_0263 | hypothetical protein                                                   |
| 35 | up | Cbei_4171 | polar amino acid ABC transporter inner membranesubunit                 |
| 36 | up | Cbei_2360 | alpha-N-arabinofuranosidase                                            |
| 37 | up | Cbei_3518 | aldose 1-epimerase                                                     |
| 38 | up | Cbei_0261 | RND family efflux transporter MFP subunit                              |
| 38 | up | Cbei_4543 | coenzyme A transferase                                                 |
| 38 | up | Cbei_4170 | polar amino acid ABC transporter inner membranesubunit                 |
| 39 | up | Cbei_4449 | ABC transporter                                                        |
| 40 | up | Cbei_4936 | aldehyde dehydrogenase                                                 |
| 40 | up | Cbei_0315 | pyruvate formate-lyase                                                 |
| 41 | up | Cbei_3519 | hydantoinase/oxoprolinase                                              |
| 41 | up | Cbei_1458 | pyruvate flavodoxin/ferredoxin oxidoreductasedomain-containing protein |
| 42 | up | Cbei_3522 | citrate transporter                                                    |
| 44 | up | Cbei_0265 | hypothetical protein                                                   |
| 45 | up | Cbei_3523 | hypothetical protein                                                   |

---

|     |      |            |                                                                         |
|-----|------|------------|-------------------------------------------------------------------------|
| 51  | up   | Cbei_4940  | spermidine/putrescine ABC transporter ATPase                            |
| 53  | up   | Cbei_4125  | sugar<br>(glycoside-Pentoside-hexuronide)transporter                    |
| 53  | up   | Cbei_0266  | hypothetical protein                                                    |
| 54  | up   | Cbei_3878  | extracellular solute-binding protein                                    |
| 55  | up   | Cbei_1834  | histidine triad (HIT) protein                                           |
| 60  | up   | Cbei_0701  | glycyl-radical activating family protein                                |
| 61  | up   | Cbei_0316  | glycyl-radical activating family protein                                |
| 73  | up   | Cbei_4448  | monosaccharide-transporting ATPase                                      |
| 76  | up   | Cbei_1598  | RpiR family transcriptional regulator                                   |
| 81  | up   | Cbei_2343  | AsnC family transcriptional regulator                                   |
| 81  | up   | Cbei_5059  | methyl-accepting chemotaxis sensory transducer                          |
| 83  | up   | Cbei_0306  | ATPase P                                                                |
| 84  | up   | Cbei_1838  | altronate oxidoreductase                                                |
| 87  | up   | Cbei_0454  | rhamnulose-1-phosphate aldolase                                         |
| 93  | up   | Cbei_1836  | keto-hydroxyglutarate-aldolase/keto-deoxy-phosp<br>hogluconate aldolase |
| 94  | up   | Cbei_2757  | allophanate hydrolase subunit 1                                         |
| 94  | up   | Cbei_0455  | "L-1,2-propanediol oxidoreductase"                                      |
| 105 | up   | Cbei_0318  | mannose-1-phosphate guanylyltransferase (GDP)                           |
| 105 | up   | Cbei_1837  | ribokinase-like domain-containing protein                               |
| 107 | up   | Cbei_2755  | biotin/lipoyl attachment<br>domain-containingprotein                    |
| 116 | up   | Cbei_2759  | LamB/YcsF family protein                                                |
| 118 | up   | Cbei_1839  | altronate dehydratase                                                   |
| 137 | up   | Cbei_2761  | hypothetical protein                                                    |
| 164 | up   | Cbei_1835  | sugar<br>(glycoside-Pentoside-hexuronide)transporter                    |
| 189 | up   | Cbei_2760  | hypothetical protein                                                    |
| 243 | up   | Cbei_2342  | aspartate ammonia-lyase                                                 |
| 246 | up   | Cbei_2762  | class IV aminotransferase                                               |
| 4.5 | down | Cbei_1539  | adenine phosphoribosyltransferase                                       |
| 4.5 | down | Cbei_1032  | RNA-binding S1 domain-containing protein                                |
| 4.5 | down | Cbei_1445  | hypothetical protein                                                    |
| 4.5 | down | Cbei_3656  | iron-sulfur flavoprotein                                                |
| 4.5 | down | Cbei_2576  | cof family hydrolase                                                    |
| 4.6 | down | Cbei_3075  | PAS/PAC sensor-containing<br>diguanylatecyclase/phosphodiesterase       |
| 4.6 | down | Cbei_1088  | "membrane bound O-acyl transferase, MBOAT<br>familyprotein"             |
| 4.6 | down | Cbei_4925  | PAS/PAC sensor signal transduction<br>histidinekinase                   |
| 4.6 | down | Cbei_3138  | cupin                                                                   |
| 4.6 | down | Cbei_1224  | riboflavin biosynthesis protein RibD                                    |
| 4.6 | down | Cbei_1153  | ribulose-phosphate 3-epimerase                                          |
| 4.6 | down | Cbei_1344  | hypothetical protein                                                    |
| 4.6 | down | Cbei_1078  | HutP protein                                                            |
| 4.6 | down | Cbei_R0070 | 5S ribosomal RNA                                                        |

|     |      |            |                                                                      |
|-----|------|------------|----------------------------------------------------------------------|
| 4.6 | down | Cbei_0406  | Sua5/YciO/YrdC/YwIC family protein                                   |
| 4.7 | down | Cbei_0599  | triosephosphate isomerase                                            |
| 4.7 | down | Cbei_1315  | histidine--tRNA ligase                                               |
| 4.7 | down | Cbei_5100  | single-stranded nucleic acid binding<br>R3Hdomain-containing protein |
| 4.7 | down | Cbei_1146  | methionyl-tRNA formyltransferase                                     |
| 4.7 | down | Cbei_3323  | antibiotic transport-associated<br>permeaseSpaG/MutG                 |
| 4.7 | down | Cbei_2029  | K <sup>+</sup> potassium transporter                                 |
| 4.7 | down | Cbei_0996  | mannose-6-phosphate isomerase                                        |
| 4.7 | down | Cbei_5028  | 1-acyl-sn-glycerol-3-phosphate acyltransferase                       |
| 4.7 | down | Cbei_2232  | serine dehydratase subunit alpha                                     |
| 4.7 | down | Cbei_1911  | hypothetical protein                                                 |
| 4.7 | down | Cbei_2887  | "electron transfer<br>flavoprotein,alpha/beta-subunit-like protein"  |
| 4.8 | down | Cbei_0598  | phosphoglycerate kinase                                              |
| 4.8 | down | Cbei_1151  | protein kinase                                                       |
| 4.8 | down | Cbei_0439  | RNA-binding S1 domain-containing protein                             |
| 4.8 | down | Cbei_4851  | pyruvate kinase                                                      |
| 4.8 | down | Cbei_0499  | cell cycle protein                                                   |
| 4.8 | down | Cbei_3105  | dihydrouridine synthase                                              |
| 4.8 | down | Cbei_2179  | hypothetical protein                                                 |
| 4.8 | down | Cbei_3063  | hypothetical protein                                                 |
| 4.8 | down | Cbei_2883  | acyl-CoA dehydrogenase<br>domain-containingprotein                   |
| 4.8 | down | Cbei_2484  | two component transcriptional regulator                              |
| 4.9 | down | Cbei_4725  | cell wall binding repeat-containing protein                          |
| 4.9 | down | Cbei_0509  | hypothetical protein                                                 |
| 4.9 | down | Cbei_2845  | two component transcriptional regulator                              |
| 4.9 | down | Cbei_2884  | FAD linked oxidase domain-containing protein                         |
| 4.9 | down | Cbei_3398  | phage-like element pbsx protein XkdK                                 |
| 4.9 | down | Cbei_1799  | type 11 methyltransferase                                            |
| 4.9 | down | Cbei_4289  | flagellin domain-containing protein                                  |
| 4.9 | down | Cbei_3197  | glycosyl transferase family protein                                  |
| 4.9 | down | Cbei_0407  | RpiB/LacA/LacB family sugar-phosphate<br>isomerase                   |
| 5   | down | Cbei_R0030 | tRNA-Cys                                                             |
| 5   | down | Cbei_2182  | ferredoxin-NADP(+) reductase subunit alpha                           |
| 5   | down | Cbei_4394  | hypothetical protein                                                 |
| 5   | down | Cbei_0312  | FAD linked oxidase domain-containing protein                         |
| 5.1 | down | Cbei_3397  | phage-like element pbsx protein XkdM                                 |
| 5.1 | down | Cbei_3219  | sodium:dicarboxylate symporter                                       |
| 5.1 | down | Cbei_1575  | cell division protein MraZ                                           |
| 5.1 | down | Cbei_3964  | CHAP domain-containing protein                                       |
| 5.1 | down | Cbei_1391  | methyl-accepting chemotaxis sensory transducer                       |
| 5.1 | down | Cbei_3076  | diguanylate cyclase                                                  |
| 5.1 | down | Cbei_0368  | polysaccharide deacetylase                                           |
| 5.1 | down | Cbei_0489  | Maf-like protein                                                     |
| 5.2 | down | Cbei_2424  | diguanylate cyclase/phosphodiesterase                                |

|     |      |            |                                                             |
|-----|------|------------|-------------------------------------------------------------|
| 5.2 | down | Cbei_4391  | hypothetical protein                                        |
| 5.2 | down | Cbei_2967  | hypothetical protein                                        |
| 5.2 | down | Cbei_4665  | glycoside hydrolase                                         |
| 5.2 | down | Cbei_0597  | "glyceraldehyde-3-phosphate dehydrogenase, typeI"           |
| 5.2 | down | Cbei_2659  | pseudouridine synthase                                      |
| 5.2 | down | Cbei_0508  | 50S ribosomal protein L21                                   |
| 5.2 | down | Cbei_2183  | oxidoreductase                                              |
| 5.2 | down | Cbei_2639  | hypothetical protein                                        |
| 5.3 | down | Cbei_1343  | hypothetical protein                                        |
| 5.3 | down | Cbei_0596  | DeoR family transcriptional regulator                       |
| 5.3 | down | Cbei_0491  | rod shape-determining protein MreB                          |
| 5.3 | down | Cbei_4832  | methyl-accepting chemotaxis sensory transducer              |
| 5.4 | down | Cbei_0418  | F0F1 ATP synthase subunit beta                              |
| 5.4 | down | Cbei_1226  | GTP cyclohydrolase II                                       |
| 5.4 | down | Cbei_R0074 | tRNA-Gln                                                    |
| 5.4 | down | Cbei_1724  | glycosyl transferase family protein                         |
| 5.5 | down | Cbei_1775  | phosphate transporter                                       |
| 5.5 | down | Cbei_1400  | glycosyl transferase family protein                         |
| 5.5 | down | Cbei_4392  | hypothetical protein                                        |
| 5.5 | down | Cbei_0196  | phosphoenolpyruvate-protein phosphotransferase              |
| 5.5 | down | Cbei_4403  | hypothetical protein                                        |
| 5.6 | down | Cbei_1425  | permease                                                    |
| 5.6 | down | Cbei_0301  | biotin synthase                                             |
| 5.6 | down | Cbei_0118  | 4Fe-4S ferredoxin                                           |
| 5.6 | down | Cbei_4670  | 6-phospho-beta-glucosidase                                  |
| 5.7 | down | Cbei_3568  | hypothetical protein                                        |
| 5.7 | down | Cbei_4839  | aminoglycoside N(3')-acetyltransferase                      |
| 5.7 | down | Cbei_0419  | ATP synthase F1 subunit epsilon                             |
| 5.7 | down | Cbei_R0042 | tRNA-Lys                                                    |
| 5.7 | down | Cbei_R0088 | 5S ribosomal RNA                                            |
| 5.7 | down | Cbei_0356  | deoxyribonucleotide triphosphatepyrophosphatase             |
| 5.7 | down | Cbei_1819  | membrane-spanning protein                                   |
| 5.8 | down | Cbei_1637  | hypothetical protein                                        |
| 5.8 | down | Cbei_4709  | UDP-3-O-(R-3-hydroxymyristoyl)-glucosamineN-acyltransferase |
| 5.8 | down | Cbei_1145  | peptide deformylase                                         |
| 5.8 | down | Cbei_4524  | NADPH-dependent FMN reductase                               |
| 5.8 | down | Cbei_4325  | glycosyl transferase family protein                         |
| 5.9 | down | Cbei_0028  | carbamoyl phosphate synthase small subunit                  |
| 5.9 | down | Cbei_1225  | riboflavin synthase subunit alpha                           |
| 5.9 | down | Cbei_1237  | S-ribosylhomocysteinase                                     |
| 5.9 | down | Cbei_1899  | glyoxalase/bleomycin resistanceprotein/dioxygenase          |
| 6   | down | Cbei_0357  | phosphodiesterase                                           |
| 6   | down | Cbei_0510  | 50S ribosomal protein L27                                   |
| 6   | down | Cbei_1227  | "6,7-dimethyl-8-ribityllumazine synthase"                   |
| 6   | down | Cbei_4718  | cell wall binding repeat-containing protein                 |

---

|     |      |            |                                                     |
|-----|------|------------|-----------------------------------------------------|
| 6.1 | down | Cbei_3688  | hypothetical protein                                |
| 6.1 | down | Cbei_1641  | hypothetical protein                                |
| 6.1 | down | Cbei_2882  | hypothetical protein                                |
| 6.1 | down | Cbei_3616  | XRE family transcriptional regulator                |
| 6.1 | down | Cbei_5003  | cyclopropane-fatty-acyl-phospholipid synthase       |
| 6.1 | down | Cbei_4407  | hypothetical protein                                |
| 6.1 | down | Cbei_4714  | hypothetical protein                                |
| 6.2 | down | Cbei_1640  | hypothetical protein                                |
| 6.2 | down | Cbei_4841  | oxidoreductase domain-containing protein            |
| 6.2 | down | Cbei_4483  | beta-lactamase domain-containing protein            |
| 6.2 | down | Cbei_3693  | cobalt ABC transporter ATPase                       |
| 6.2 | down | Cbei_5104  | 50S ribosomal protein L34                           |
| 6.2 | down | Cbei_1635  | phage-related terminase small subunit-likeprotein   |
| 6.2 | down | Cbei_2475  | TetR family transcriptional regulator               |
| 6.3 | down | Cbei_4629  | polysaccharide biosynthesis protein CapD            |
| 6.3 | down | Cbei_4523  | nitroreductase                                      |
| 6.4 | down | Cbei_2166  | hypothetical protein                                |
| 6.4 | down | Cbei_0982  | ribosomal 5S rRNA E-loop binding proteinCtc/L25/TL5 |
| 6.4 | down | Cbei_1316  | ATP phosphoribosyltransferase                       |
| 6.4 | down | Cbei_0995  | hypothetical protein                                |
| 6.4 | down | Cbei_4852  | 6-phosphofructokinase                               |
| 6.4 | down | Cbei_3106  | heat shock protein DnaJ domain-containingprotein    |
| 6.4 | down | Cbei_1396  | BAAT/Acyl-CoA thioester hydrolase-like protein      |
| 6.5 | down | Cbei_4335  | ABC transporter                                     |
| 6.6 | down | Cbei_R0057 | tRNA-Tyr                                            |
| 6.6 | down | Cbei_1644  | hypothetical protein                                |
| 6.6 | down | Cbei_4623  | cell wall binding repeat-containing protein         |
| 6.8 | down | Cbei_4090  | N-acetyltransferase GCN5                            |
| 6.8 | down | Cbei_4910  | N-acetyltransferase GCN5                            |
| 7   | down | Cbei_R0041 | tRNA-Gln                                            |
| 7   | down | Cbei_0029  | carbamoyl phosphate synthase large subunit          |
| 7.1 | down | Cbei_4840  | helix-turn-helix domain-containing protein          |
| 7.1 | down | Cbei_3694  | cobalt ABC transporter permease                     |
| 7.1 | down | Cbei_1313  | thiamine biosynthesis protein ThiI                  |
| 7.1 | down | Cbei_4487  | thiamine-phosphate pyrophosphorylase                |
| 7.2 | down | Cbei_1382  | histidine kinase internal region                    |
| 7.2 | down | Cbei_1809  | hypothetical protein                                |
| 7.3 | down | Cbei_4691  | polysaccharide biosynthesis protein                 |
| 7.3 | down | Cbei_3569  | RNA polymerase factor sigma-70                      |
| 7.4 | down | Cbei_0415  | F0F1 ATP synthase subunit delta                     |
| 7.5 | down | Cbei_0401  | 50S ribosomal protein L31                           |
| 7.5 | down | Cbei_4619  | oxidoreductase domain-containing protein            |
| 7.5 | down | Cbei_2968  | DoxX family protein                                 |
| 7.5 | down | Cbei_0416  | F0F1 ATP synthase subunit alpha                     |
| 7.6 | down | Cbei_3576  | RNA polymerase factor sigma-70                      |
| 7.9 | down | Cbei_4760  | cell wall binding repeat-containing protein         |
| 7.9 | down | Cbei_4628  | hypothetical protein                                |

---

|     |      |           |                                                        |
|-----|------|-----------|--------------------------------------------------------|
| 7.9 | down | Cbei_4843 | oxidoreductase domain-containing protein               |
| 7.9 | down | Cbei_0414 | F0F1 ATP synthase subunit B                            |
| 7.9 | down | Cbei_0516 | RluA family pseudouridine synthase                     |
| 8   | down | Cbei_2330 | "methionine synthase, vitamin-B12 independent"         |
| 8   | down | Cbei_4490 | phosphomethylpyrimidine kinase                         |
| 8   | down | Cbei_3973 | MerR family transcriptional regulator                  |
| 8.1 | down | Cbei_1761 | hypothetical protein                                   |
| 8.2 | down | Cbei_3395 | hypothetical protein                                   |
| 8.2 | down | Cbei_4488 | hydroxyethylthiazole kinase                            |
| 8.3 | down | Cbei_2670 | hypothetical protein                                   |
| 8.3 | down | Cbei_0417 | F0F1 ATP synthase subunit gamma                        |
| 8.3 | down | Cbei_3623 | hypothetical protein                                   |
| 8.5 | down | Cbei_3687 | hypothetical protein                                   |
| 8.5 | down | Cbei_4489 | thiamine biosynthesis protein ThiC                     |
| 8.5 | down | Cbei_0378 | hypothetical protein                                   |
| 8.7 | down | Cbei_1155 | 50S ribosomal protein L28                              |
| 8.7 | down | Cbei_1436 | peptidase S8/S53 subtilisin kexin sedolisin            |
| 8.7 | down | Cbei_2483 | hypothetical protein                                   |
| 8.9 | down | Cbei_1533 | queuine tRNA-ribosyltransferase                        |
| 8.9 | down | Cbei_0377 | DNA-binding/iron metalloprotein/AP<br>endonuclease     |
| 9   | down | Cbei_1642 | hypothetical protein                                   |
| 9   | down | Cbei_4618 | UTP-glucose-1-phosphate uridylyltransferase            |
| 9   | down | Cbei_4842 | xylose isomerase domain-containing protein             |
| 9.1 | down | Cbei_1149 | ribosomal RNA large subunit methyltransferase<br>N     |
| 9.3 | down | Cbei_2545 | 4-hydroxy-3-methylbut-2-enyl<br>diphosphatereductase   |
| 9.4 | down | Cbei_3695 | cobalt transport protein CbiM                          |
| 9.5 | down | Cbei_3171 | accessory gene regulator B                             |
| 9.6 | down | Cbei_0346 | nitroreductase                                         |
| 9.6 | down | Cbei_3974 | aldo/keto reductase                                    |
| 9.7 | down | Cbei_4405 | hypothetical protein                                   |
| 9.7 | down | Cbei_4669 | glycoside hydrolase                                    |
| 9.9 | down | Cbei_0413 | F0F1 ATP synthase subunit C                            |
| 10  | down | Cbei_0412 | F0F1 ATP synthase subunit A                            |
| 10  | down | Cbei_1395 | MarR family transcriptional regulator                  |
| 10  | down | Cbei_2028 | two component transcriptional regulator                |
| 10  | down | Cbei_2482 | hypothetical protein                                   |
| 10  | down | Cbei_1494 | hypothetical protein                                   |
| 10  | down | Cbei_1310 | RelA/SpoT domain-containing protein                    |
| 11  | down | Cbei_1495 | hypothetical protein                                   |
| 11  | down | Cbei_0656 | deoxyuridine 5'-triphosphate<br>nucleotidohydrolaseDut |
| 11  | down | Cbei_1516 | ABC transporter                                        |
| 11  | down | Cbei_4406 | hypothetical protein                                   |
| 11  | down | Cbei_4620 | sugar transferase                                      |
| 11  | down | Cbei_4491 | thiW protein                                           |
| 11  | down | Cbei_3975 | cell wall binding repeat-containing protein            |

|    |      |           |                                                                          |     |
|----|------|-----------|--------------------------------------------------------------------------|-----|
| 11 | down | Cbei_4521 | ornithine carbamoyltransferase                                           |     |
| 11 | down | Cbei_4689 | hypothetical protein                                                     |     |
| 11 | down | Cbei_0486 | aminoacyl-histidine dipeptidase                                          |     |
| 12 | down | Cbei_3354 | NADPH-dependent FMN reductase                                            |     |
| 12 | down | Cbei_4408 | carboxynorspermidine decarboxylase                                       |     |
| 13 | down | Cbei_4690 | membrane spanning protein                                                |     |
| 13 | down | Cbei_0280 | hypothetical protein                                                     |     |
| 13 | down | Cbei_3755 | hypothetical protein                                                     |     |
| 13 | down | Cbei_4103 | two component transcriptional regulator                                  |     |
| 13 | down | Cbei_4113 | alanine racemase                                                         |     |
| 14 | down | Cbei_4694 | nucleotidyl transferase                                                  |     |
| 14 | down | Cbei_2445 | hypothetical protein                                                     |     |
| 14 | down | Cbei_4339 | nucleotidyl transferase                                                  |     |
| 14 | down | Cbei_2181 | iron-containing alcohol dehydrogenase                                    |     |
| 15 | down | Cbei_3912 | VanZ family protein                                                      |     |
| 15 | down | Cbei_3324 | lantibiotic permease spaE/mutE                                           |     |
| 15 | down | Cbei_1649 | Phage XkdN-like protein                                                  |     |
| 16 | down | Cbei_1807 | secretion protein HlyD family protein                                    |     |
| 16 | down | Cbei_3286 | hypothetical protein                                                     |     |
| 16 | down | Cbei_4695 | choline/ethanolamine kinase                                              |     |
| 16 | down | Cbei_4520 | acetylornithine succinylornithineaminotransferase                        | and |
| 16 | down | Cbei_2981 | hypothetical protein                                                     |     |
| 17 | down | Cbei_1722 | iron-containing alcohol dehydrogenase                                    |     |
| 17 | down | Cbei_4519 | acetylglutamate kinase                                                   |     |
| 17 | down | Cbei_4517 | N-acetyl-gamma-glutamyl-phosphate reductase                              |     |
| 17 | down | Cbei_1808 | ABC transporter                                                          |     |
| 18 | down | Cbei_4336 | class V aminotransferase                                                 |     |
| 18 | down | Cbei_3325 | ABC transporter                                                          |     |
| 18 | down | Cbei_2027 | osmosensitive K <sup>+</sup> channel signal transductionhistidine kinase |     |
| 19 | down | Cbei_3396 | Phage XkdN-like protein                                                  |     |
| 19 | down | Cbei_1806 | hypothetical protein                                                     |     |
| 19 | down | Cbei_0538 | hypothetical protein                                                     |     |
| 19 | down | Cbei_2842 | hypothetical protein bifunctional                                        |     |
| 20 | down | Cbei_4518 | ornithineacetyltransferase/N-acetylglutamate synthase                    |     |
| 21 | down | Cbei_4337 | thiamine pyrophosphate binding domain-containingprotein                  |     |
| 22 | down | Cbei_2843 | hypothetical protein                                                     |     |
| 23 | down | Cbei_4516 | argininosuccinate lyase                                                  |     |
| 23 | down | Cbei_1311 | NAD-binding 6-phosphogluconate dehydrogenase                             |     |
| 26 | down | Cbei_4515 | argininosuccinate synthase                                               |     |
| 33 | down | Cbei_2982 | hypothetical protein                                                     |     |
| 34 | down | Cbei_1138 | hypothetical protein                                                     |     |
| 35 | down | Cbei_1820 | hypothetical protein                                                     |     |
| 35 | down | Cbei_4717 | cell wall binding repeat-containing protein                              |     |

---

|    |      |           |                                                                          |
|----|------|-----------|--------------------------------------------------------------------------|
| 37 | down | Cbei_4338 | cytidyltransferase-like protein                                          |
| 43 | down | Cbei_2844 | ABC transporter                                                          |
| 44 | down | Cbei_1309 | sodium:dicarboxylate symporter                                           |
| 57 | down | Cbei_1308 | "UDP-N-acetylmuramoylalanyl-D-glutamate--2,6<br>-diaminopimelate ligase" |
| 61 | down | Cbei_0657 | type 11 methyltransferase                                                |
| 85 | down | Cbei_2188 | hypothetical protein                                                     |

---



Table S5A. Fold change of solvent production genes according to microarray analysis

| Gene Symbol | Protein/Enzyme                                  | Fold Change  |                 |
|-------------|-------------------------------------------------|--------------|-----------------|
|             |                                                 | acidogenesis | solventogenesis |
| Cbei_3516   | pyruvate synthase                               | -2.70        | -1.57           |
| Cbei_2063   |                                                 | +1.15        | +2.98           |
| Cbei_1853   | pyruvate/ferredoxin oxidoreductase              | +3.58        | +6.21           |
| Cbei_1458   |                                                 | +2.01        | +41.18          |
| Cbei_4042   |                                                 | +2.60        | +3.11           |
| Cbei_1165   | acetate kinase                                  | -2.33        | -1.19           |
| Cbei_1164   | phosphotransacetylase                           | -2.37        | -1.67           |
| Cbei_1953   | aldehyde dehydrogenase                          | +2.43        | -1.22           |
| Cbei_3832   |                                                 | -1.37        | -1.40           |
| Cbei_2518   |                                                 | +4.33        | +4.83           |
| Cbei_0305   |                                                 | +3.36        | +4.01           |
| Cbei_4045   |                                                 | +1.5         | +2.28           |
| Cbei_4936   |                                                 | +164.7       | +39.86          |
| Cbei_0729   |                                                 | +1.21        | +3.17           |
| Cbei_1932   |                                                 | -1.98        | -2.56           |
| Cbei_4552   | alcohol dehydrogenase                           | +3.42        | +5.31           |
| Cbei_0223   |                                                 | +1.21        | -1.01           |
| Cbei_0305   |                                                 | +3.36        | +4.01           |
| Cbei_4354   |                                                 | +8.44        | +3.0            |
| Cbei_2194   |                                                 | +1.35        | +4.44           |
| Cbei_1937   |                                                 | +159.77      | +11.52          |
| Cbei_0455   |                                                 | +1.95        | +93.9           |
| Cbei_0528   |                                                 | +2.73        | +4.18           |
| Cbei_3630   | thiolase (acetyl-CoA acetyltransferase)         | +2.12        | +5.19           |
| Cbei_3835   | acetoacetate decarboxylase                      | +1.01        | +1.10           |
| Cbei_3819   | acetoacetyl-CoA transferase subunit A           | -1.56        | -1.57           |
| Cbei_2040   |                                                 | +3.40        | +4.69           |
| Cbei_3278   |                                                 | +3.99        | +12.99          |
| Cbei_3833   | butyrate-acetoacetate CoA-transferase subunit A | -1.27        | -1.0            |
| Cbei_0325   | 3-hydroxybutyryl-CoA dehydrogenase              | +1.26        | -1.01           |
| Cbei_2231   | Enoyl-CoA hydratase                             | -1.06        | -2.27           |
| Cbei_2883   | butyryl-CoA dehydrogenase                       | +3.17        | -4.85           |
| Cbei_3820   |                                                 | -1.12        | +1.80           |
| Cbei_4609   | butyrate kinase                                 | +1.01        | -1.95           |
| Cbei_4006   |                                                 | +6.05        | -1.39           |
| Cbei_4899   | phosphotrans butyrylase                         | -2.5         | -1.19           |

Table S5B. Fold change of sugar transporter genes according to microarray analysis

| Cbei Symbol          | Protein/Enzyme                                               | Fold Change (Acidogenesis) | Fold Change (Solventogenesis) |
|----------------------|--------------------------------------------------------------|----------------------------|-------------------------------|
| two-component system |                                                              |                            |                               |
| Cbei_0444            | glutamine synthetase                                         | +9.45                      | +17                           |
| Cbei_0660            | accessory gene regulator B                                   | -2.59                      | -2.55                         |
| Cbei_1127            | phosphate binding protein                                    | -5.2                       | +4.38                         |
| Cbei_1749            | anthranilate synthase component I                            | +8.11                      | +7.03                         |
| Cbei_1752            | Indole-3-glycerol phosphate synthase                         | ND*                        | +9.36                         |
| Cbei_3630            | acetyl-CoA acetyltransferase                                 | +2.12                      | +5.19                         |
| Cbei_4008            | malate dehydrogenase                                         | +44                        | ND*                           |
| Cbei_4015            | response regulator receiver protein                          | +2.34                      | +3.15                         |
| Cbei_4018            | CheW protein                                                 | +3.42                      | +8.11                         |
| Cbei_4174            | response regulator receiver                                  | +2.03                      | ND*                           |
| Cbei_4180            | response regulator receiver modulated CheB methyltransferase | +6.24                      | +4.01                         |
| Cbei_4181            | protein-glutamate O-methyltransferase                        | +3.33                      | +3.5                          |
| Cbei_4183            | chemotaxis protein CheA                                      | +5.3                       | +5.8                          |
| Cbei_4184            | CheW protein                                                 | ND*                        | +2.86                         |
| Cbei_4206            | glutamine synthetase, type I                                 | +6.46                      | +2.93                         |
| Cbei_4308            | protein-glutamate O-methyltransferase                        | +2.8                       | ND*                           |
| Cbei_4311            | CheW protein                                                 | ND*                        | +2.51                         |
| Cbei_4430            | multi-sensor signal transduction histidine kinase            | +2.21                      | ND*                           |
| Cbei_4458            | histidine kinase internal region                             | +2.05                      | +21.4                         |
| Cbei_4579            | sensor histidine kinase-like protein                         | ND*                        | +2.85                         |
| Cbei_4942            | nitrogen regulatory protein P-II                             | +130                       | +2.13                         |
| Cbei_5033            | nitrogen regulatory protein P-II                             | +8.65                      | +9.13                         |
| ABC transporter      |                                                              |                            |                               |
| Cbei_0638            | YaeC family lipoprotein                                      | +2.09                      | +3.7                          |

|           |                                                                  |       |       |
|-----------|------------------------------------------------------------------|-------|-------|
| Cbei_1762 | extracellular ligand-binding receptor                            | +5.57 | +4.7  |
| Cbei_1763 | inner-membrane translocator                                      | +6.33 | +5.63 |
| Cbei_1764 | inner-membrane translocator                                      | +4.5  | +5.8  |
| Cbei_1765 | ABC transporter                                                  | +3.97 | +5.87 |
| Cbei_1766 | ABC transporter                                                  | +5.86 | +4.88 |
| Cbei_1767 | extracellular ligand-binding receptor                            | +3.62 | +6.72 |
| Cbei_1938 | ABC transporter                                                  | +166  | ND*   |
| Cbei_1940 | binding-protein-dependent transport system innermembrane protein | +325  | ND*   |
| Cbei_1941 | NMT1/THI5-like protein                                           | +112  | +30.9 |
| Cbei_1992 | molybdenum ABC transporter periplasmicmolybdate-binding protein  | +8.27 | ND*   |
| Cbei_2394 | ABC transporter                                                  | +2.53 | +3.96 |
| Cbei_2765 | ABC transporter                                                  | +246  | ND*   |
| Cbei_2767 | inner-membrane translocator                                      | +161  | ND*   |
| Cbei_2768 | inner-membrane translocator                                      | +275  | ND*   |
| Cbei_2769 | extracellular ligand-binding receptor                            | +368  | ND*   |
| Cbei_2870 | glycine/betaine ABC transportersubstrate-binding protein         | +2.98 | +12.2 |
| Cbei_3703 | transport system permease                                        | +4.93 | +2.71 |
| Cbei_3704 | ABC transporter                                                  | +2.13 | ND*   |
| Cbei_4432 | monosaccharide-transporting ATPase                               | +4.92 | ND*   |
| Cbei_4433 | ABC transporter                                                  | +10.1 | ND*   |
| Cbei_4928 | extracellular solute-binding protein                             | +12.3 | +18.1 |
| Cbei_4929 | peptide ABC transporter ATPase                                   | +15.8 | +12.3 |
| Cbei_4930 | peptide ABC transporter ATPase                                   | +12.1 | +6.64 |
| Cbei_4931 | binding-protein-dependent transport system innermembrane protein | +11.8 | +3.6  |
| Cbei_4932 | binding-protein-dependent transport system innermembrane protein | +9.66 | +4.43 |
| Cbei_4940 | spermidine/putrescine ABC transporter ATPase                     | +147  | +50.8 |
| Cbei_4941 | extracellular solute-binding protein                             | +158  | +15.3 |
| Cbei_5042 | extracellular ligand-binding receptor                            | +11.5 | ND*   |
| Cbei_5043 | inner-membrane translocator                                      | +8.67 | ND*   |

| Pyruvate metabolism                      |                                                                     |       |       |
|------------------------------------------|---------------------------------------------------------------------|-------|-------|
| Cbei_1076                                | acetyl-CoA carboxylase, carboxyl transferasesubunit beta            | +2.27 | ND*   |
| Cbei_0213                                | alpha-isopropylmalate/homocitrate synthasefamily transferase        | +19.9 | +4.32 |
| Cbei_0305                                | bifunctional acetaldehyde-CoA/alcoholdehydrogenase                  | +3.36 | +4.01 |
| Cbei_0315                                | pyruvate formate-lyase                                              | ND*   | +40.3 |
| Cbei_0455                                | L-1,2-propanediol oxidoreductase                                    | ND*   | +93.9 |
| Cbei_0705                                | pyruvate formate-lyase                                              | ND*   | +5.01 |
| Cbei_1011                                | formate acetyltransferase                                           | +7.41 | +7.95 |
| Cbei_2012                                | homocitrate synthase                                                | +41.4 | 16.4  |
| Cbei_2063                                | phosphoenolpyruvate synthase                                        | ND*   | +2.98 |
| Cbei_2754                                | acetyl-CoA carboxylase, biotin carboxylase                          | +32   | +14.6 |
| Cbei_2789                                | L-lactate dehydrogenase                                             | +7.02 | +3.84 |
| Cbei_3630                                | acetyl-CoA acetyltransferase                                        | +2.12 | +5.19 |
| Cbei_4008                                | malate dehydrogenase                                                | +44   | ND*   |
| Cbei_4045                                | aldehyde dehydrogenase                                              | ND*   | +2.28 |
| Cbei_4903                                | L-lactate dehydrogenase                                             | +3.01 | -2.06 |
| Cbei_4960                                | pyruvate carboxylase                                                | ND*   | +2.46 |
| Pentose and glucuronate interconversions |                                                                     |       |       |
| Cbei_0447                                | 5-keto-4-deoxyuronate isomerase                                     | +2.01 | +4.87 |
| Cbei_0454                                | rhamnulose-1-phosphate aldolase                                     | ND*   | +87.5 |
| Cbei_0460                                | 2-deoxy-D-gluconate 3-dehydrogenase                                 | ND*   | +4.49 |
| Cbei_0461                                | ribokinase-like domain-containing protein                           | ND*   | +9.71 |
| Cbei_0462                                | 2-dehydro-3-deoxyphosphogluconate aldolase                          | ND*   | +8.15 |
| Cbei_1832                                | glucuronate isomerase                                               | ND*   | +29.9 |
| Cbei_1833                                | altronate oxidoreductase                                            | ND*   | +21.3 |
| Cbei_1836                                | keto-hydroxyglutarate-aldolase/keto-deoxy-phosphogluconate aldolase | ND*   | +92.5 |
| Cbei_1837                                | ribokinase-like domain-containing protein                           | ND*   | +105  |
| Cbei_1838                                | altronate oxidoreductase                                            | ND*   | +83.5 |
| Cbei_1839                                | altronate dehydratase                                               | ND*   | +118  |

|                              |                                                                     |       |       |
|------------------------------|---------------------------------------------------------------------|-------|-------|
| Cbei_2200                    | mannonate dehydratase                                               | ND*   | +6.99 |
| Cbei_2201                    | 2-dehydro-3-deoxyphosphogluconate aldolase                          | ND*   | +8.6  |
| Cbei_2384                    | xylulokinase                                                        | ND*   | +26.1 |
| Cbei_2458                    | 5-keto-4-deoxyuronate isomerase                                     | ND*   | +6.35 |
| Cbei_4082                    | glucuronate isomerase                                               | ND*   | +5.3  |
| Cbei_4083                    | mannitol dehydrogenase domain-containing protein                    | ND*   | +5.46 |
| Cbei_4084                    | mannonate dehydratase                                               | ND*   | +2.81 |
| Cbei_4457                    | L-arabinose isomerase                                               | ND*   | +14.1 |
| Cbei_2383                    | xylose isomerase                                                    | ND*   | +27.1 |
| Pentose phosphate metabolism |                                                                     |       |       |
| Cbei_0225                    | transketolase, central region                                       | +3.19 | +4.34 |
| Cbei_0461                    | ribokinase-like domain-containing protein                           | ND*   | +9.71 |
| Cbei_0462                    | 2-dehydro-3-deoxyphosphogluconate aldolase                          | ND*   | +8.15 |
| Cbei_1836                    | keto-hydroxyglutarate-aldolase/keto-deoxy-phosphogluconate aldolase | ND*   | +92.5 |
| Cbei_1837                    | ribokinase-like domain-containing protein                           | ND*   | +105  |
| Cbei_2076                    | ribose-phosphate pyrophosphokinase                                  | ND*   | +6.7  |
| Cbei_2192                    | 6-phosphogluconate dehydrogenase                                    | ND*   | +2.83 |
| Cbei_2201                    | 2-dehydro-3-deoxyphosphogluconate aldolase                          | ND*   | +8.6  |
| Cbei_2386                    | transaldolase                                                       | ND*   | +6.87 |
| Cbei_2387                    | transketolase                                                       | ND*   | +11   |
| Cbei_2432                    | phosphoribosylpyrophosphate synthetase                              | -2.76 | +2.03 |
| Cbei_3120                    | deoxyribose-phosphate aldolase                                      | ND*   | +2.22 |
| Cbei_4453                    | transketolase                                                       | ND*   | +10.8 |
| Cbei_4454                    | transaldolase                                                       | ND*   | +8.28 |
| Cbei_4551                    | hypothetical protein                                                | ND*   | +5.72 |
| Cbei_4644                    | transketolase                                                       | ND*   | +11   |
| Cbei_4645                    | transaldolase                                                       | ND*   | +8.33 |

\*: ND means NOT detected.

Table S5C. Fold change of amino acids biosynthesis / metabolism genes according to microarray analysis.

| Cbei Symbol                                         | Protein/Enzyme                                     | Fold Change  |                 |
|-----------------------------------------------------|----------------------------------------------------|--------------|-----------------|
|                                                     |                                                    | Acidogenesis | Solventogenesis |
| Phenylalanine, tyrosine and tryptophan biosynthesis |                                                    |              |                 |
| Cbei_4570                                           | 3-dehydroquinate dehydratase                       | +5.17        | +2.97           |
| Cbei_4575                                           | 3-phosphoshikimate 1-carboxyvinyltransferase       | +2.2         | +3.04           |
| Cbei_1749                                           | anthranilate synthase component I                  | +8.11        | +7.03           |
| Cbei_1750                                           | glutamine amidotransferase of anthranilatesynthase | +8.75        | +9.3            |
| Cbei_1752                                           | Indole-3-glycerol phosphate synthase               | ND*          | +9.36           |
| Cbei_1753                                           | phosphoribosylanthranilate isomerase               | ND*          | +15.1           |
| Cbei_1755                                           | tryptophan synthase subunit alpha                  | ND*          | +7.22           |
| Cbei_1754                                           | tryptophan synthase subunit beta                   | ND*          | +10.9           |
| Cbei_4573                                           | chorismate mutase                                  | +2.67        | +4.75           |
| Cbei_4574                                           | chorismate synthase                                | +2.38        | +2.78           |
| Cbei_4572                                           | shikimate 5-dehydrogenase                          | +2.98        | +2.86           |
| Cbei_4571                                           | shikimate kinase                                   | +3.96        | +2.82           |
| Cbei_1295                                           | hypothetical protein                               | ND*          | +2.59           |
| Alanine, aspartate and glutamate metabolism         |                                                    |              |                 |
| Cbei_5074                                           | adenylosuccinate synthetase                        | -4.68        | -2.91           |
| Cbei_4516                                           | argininosuccinate lyase                            | -24.2        | -22.6           |
| Cbei_4515                                           | argininosuccinate synthase                         | -16.7        | -26.3           |
| Cbei_0028                                           | carbamoyl phosphate synthase small subunit         | -10.1        | -5.88           |
| Cbei_1034                                           | asparagine synthase                                | -2.02        | ND*             |
| Cbei_1221                                           | adenylosuccinate lyase                             | -3.25        | -2.57           |
| Cbei_1830                                           | oxidoreductase                                     | -2.62        | ND*             |
| Selenocompound metabolism                           |                                                    |              |                 |
| Cbei_0055                                           | methionyl-tRNA synthetase                          | ND*          | +3.09           |
| Cbei_1851                                           | SufS subfamily cysteine desulfurase                | ND*          | +3.35           |

|                                             |                                                              |       |       |
|---------------------------------------------|--------------------------------------------------------------|-------|-------|
| Cbei_3185                                   | methionine--tRNA ligase                                      | +5.39 | +32.8 |
| Cbei_4186                                   | sulfate adenylyltransferase, large subunit                   | ND*   | +3.61 |
| Cbei_0577                                   | cysteine synthase                                            | ND*   | +2.59 |
| Cbei_0630                                   | pyridoxal-5'-phosphate-dependent protein subunitbeta         | ND*   | +2.48 |
| Cbei_4356                                   | cysteine synthase A                                          | -2.81 | +2.38 |
| Cbei_0428                                   | S-adenosylmethionine synthetase                              | ND*   | -3.52 |
| Valine, leucine and isoleucine biosynthesis |                                                              |       |       |
| Cbei_0214                                   | 3-isopropylmalate dehydratase large subunit                  | +9.51 | +4.84 |
| Cbei_0216                                   | 3-isopropylmalate dehydrogenase                              | ND*   | +14.4 |
| Cbei_1043                                   | branched-chain amino acid aminotransferase                   | ND*   | +2.43 |
| Cbei_0212                                   | acetolactate synthase small subunit                          | +15.8 | +3.24 |
| Cbei_0213                                   | alpha-isopropylmalate/homocitrate synthasefamily transferase | +19.9 | +4.32 |
| Cbei_0217                                   | acetolactate synthase large subunit                          | ND*   | +18.2 |
| Cbei_4095                                   | dihydroxy-acid dehydratase                                   | ND*   | +3.98 |
| Cbei_4127                                   | dihydroxy-acid dehydratase                                   | ND*   | +4.56 |
| Cbei_0218                                   | ketol-acid reductoisomerase                                  | +3.83 | +12.1 |
| ABC transporter                             |                                                              |       |       |
| Cbei_0353                                   | peptide ABC transporter periplasmic protein                  | ND*   | +2.48 |
| Cbei_0638                                   | YaeC family lipoprotein                                      | +2.09 | +3.7  |
| Cbei_1127                                   | phosphate binding protein                                    | -5.2  | +4.38 |
| Cbei_1128                                   | phosphate ABC transporter permease                           | -2.92 | +6.64 |
| Cbei_1129                                   | phosphate ABC transporter permease                           | -2.64 | +8.82 |
| Cbei_1130                                   | phosphate ABC transporter ATPase                             | -2.34 | +14.8 |
| Cbei_1762                                   | extracellular ligand-binding receptor                        | +5.57 | +4.7  |
| Cbei_1763                                   | inner-membrane translocator                                  | +6.33 | +5.63 |
| Cbei_1764                                   | inner-membrane translocator                                  | +4.5  | +5.8  |
| Cbei_1765                                   | ABC transporter                                              | +3.97 | +5.87 |
| Cbei_1766                                   | ABC transporter                                              | +5.86 | +4.88 |
| Cbei_1767                                   | extracellular ligand-binding receptor                        | +3.62 | +6.72 |

|                        |                                                                  |       |       |
|------------------------|------------------------------------------------------------------|-------|-------|
| Cbei_1941              | NMT1/THI5-like protein                                           | +112  | +30.9 |
| Cbei_2357              | extracellular solute-binding protein                             | ND*   | +11.1 |
| Cbei_2358              | binding-protein-dependent transport system innermembrane protein | ND*   | +17.2 |
| Cbei_2377              | periplasmic binding protein/LacI transcriptionalregulator        | ND*   | +6.4  |
| Cbei_2382              | monosaccharide-transporting ATPase                               | ND*   | +2.79 |
| Cbei_2394              | ABC transporter                                                  | +2.53 | +3.69 |
| Cbei_2870              | glycine/betaine ABC transportersubstrate-binding protein         | +2.98 | +12.2 |
| Cbei_3096              | ABC transporter                                                  | ND*   | +14.3 |
| Cbei_3539              | glycine/betaine ABC transporter permease                         | ND*   | +2.87 |
| Cbei_3541              | glycine/betaine ABC transportersubstrate-binding protein         | ND*   | +2.41 |
| Cbei_3703              | transport system permease                                        | +4.93 | +2.71 |
| Cbei_3826              | ABC transporter                                                  | ND*   | +2.58 |
| Cbei_3979              | binding-protein-dependent transport system innermembrane protein | ND*   | +2.14 |
| Cbei_4190              | sulfate ABC transporter ATPase                                   | ND*   | +4.71 |
| Cbei_4191              | sulfate ABC transporter permease                                 | ND*   | +5.75 |
| Cbei_4192              | sulfate ABC transporter permease                                 | ND*   | +4.38 |
| Cbei_4194              | sulfate ABC transporter substrate-bindingprotein                 | ND*   | +8.71 |
| Cbei_4448              | monosaccharide-transporting ATPase                               | ND*   | +73.3 |
| Cbei_4449              | ABC transporter                                                  | ND*   | +38.9 |
| Cbei_4450              | monosaccharide-transporting ATPase                               | ND*   | +10.8 |
| Cbei_4928              | extracellular solute-binding protein                             | +12.3 | +18.1 |
| Cbei_4929              | peptide ABC transporter ATPase                                   | +15.8 | 12.3  |
| Cbei_4930              | peptide ABC transporter ATPase                                   | +12.1 | +6.64 |
| Cbei_4931              | binding-protein-dependent transport system innermembrane protein | +11.8 | +3.6  |
| Cbei_4932              | binding-protein-dependent transport system innermembrane protein | +9.66 | +4.43 |
| Cbei_4940              | spermidine/putrescine ABC transporter ATPase                     | +147  | +50.8 |
| Cbei_5045              | ABC transporter                                                  | ND*   | +4.42 |
| Cbei_5046              | ABC transporter                                                  | ND*   | +4.24 |
| Glutathione metabolism |                                                                  |       |       |



|           |                                  |       |       |
|-----------|----------------------------------|-------|-------|
| Cbei_2192 | 6-phosphogluconate dehydrogenase | ND*   | +2.83 |
| Cbei_2737 | leucyl aminopeptidase            | ND*   | +4.77 |
| Cbei_4199 | isocitrate dehydrogenase         | +2.16 | +3.45 |
| Cbei_0777 | glutathione peroxidase           | ND*   | +13.2 |
| Cbei_0389 | glutathione peroxidase           | ND*   | +6.93 |

\*: ND means NOT detected.

Table S5D. Fold change of sigma factor & sporulation genes according to microarray analysis.

| Cbei Symbol | Protein/Enzyme                                        | Fold Change  |                 |
|-------------|-------------------------------------------------------|--------------|-----------------|
|             |                                                       | Acidogenesis | Solventogenesis |
| Cbei_1302   | ECF subfamily RNA polymerase sigma-24 factor          | +6.96        | +2.28           |
| Cbei_0499   | sporulation protein E                                 | -2.92        | -4.79           |
| Cbei_1120   | sigma-29; sporulation sigma factor SigE               | -2.76        | -4.24           |
| Cbei_1122   | sporulation protein YlmC/YmxH                         | -3.91        | -3.21           |
| Cbei_1210   | sporulation protein YlmC/YmxH                         | +4.01        | +1.28           |
| Cbei_1218   | stage V sporulation protein S                         | +2.53        | +1.75           |
| Cbei_1579   | stage V sporulation protein D                         | ND*          | -2.83           |
| Cbei_5080   | sporulation protease LonC                             | +2.55        | -1.19           |
| Cbei_1712   | Spo0A protein                                         | -1.50        | -2.31           |
| Cbei_0135   | RNA polymerase factor sigma-70                        | -1.26        | -2.09           |
| Cbei_3569   | RNA polymerase factor sigma-70                        | -14.28       | -7.33           |
| Cbei_3576   | RNA polymerase factor sigma-70                        | -14.65       | -7.60           |
| Cbei_3675   | RNA polymerase factor sigma-70                        | -2.50        | -1.57           |
| Cbei_4249   | RNA polymerase sigma 28 subunit FliA/WhiG             | +1.06        | -4.04           |
| Cbei_0595   | RNA polymerase factor sigma-54                        | +1.40        | +2.04           |
| Cbei_0853   | RNA polymerase sigma factor RpoD                      | -1.03        | -3.39           |
| Cbei_4947   | sigma-K factor processing regulatory protein BofA     | +3.76        | +2.13           |
| Cbei_0432   | sigma-54 factor interaction domain-containing protein | -1.77        | +3.76           |
| Cbei_2039   | sigma-54 dependent transcriptional regulator          | -1.37        | +3.40           |
| Cbei_4686   | sigma-54 factor interaction domain-containing protein | +5.44        | +2.11           |
| Cbei_4641   | sigma-54 factor interaction domain-containing protein | +1.98        | +5.30           |

\*: ND means NOT detected.

Table S5E. Fold change of cell division proteins according to microarray analysis.

| Cbei Symbol | Protein/Enzyme                                   | Fold Change  |                 |
|-------------|--------------------------------------------------|--------------|-----------------|
|             |                                                  | Acidogenesis | Solventogenesis |
| Cbei_1117   | cell division protein FtsA                       | ND*          | -3.12           |
| Cbei_1213   | cell division protein FtsK                       | ND*          | -3.88           |
| Cbei_1173   | signal recognition particle-docking protein FtsY | ND*          | -3.01           |
| Cbei_3037   | ATP-dependent metalloprotease FtsH               | +13.9        | +16.6           |
| Cbei_1575   | cell division protein MraZ                       | ND*          | -5.07           |
| Cbei_4868   | cell division ATP-binding protein FtsE           | -2.77        | -2.0            |
| Cbei_0491   | rod shape-determining protein MreB               | ND*          | -5.28           |
| Cbei_0492   | rod shape-determining protein MreC               | ND*          | -2.1            |
| Cbei_0493   | rod shape-determining protein MreD               | ND*          | -2.14           |
| Cbei_0494   | penicillin-binding protein, transpeptidase       | ND*          | -4.42           |
| Cbei_0499   | cell cycle protein                               | -2.92        | -4.79           |
| Cbei_3365   | cell cycle protein RodA                          | -5.5         | -3.66           |
| Cbei_0425   | rod shape-determining protein Mbl                | -1.71        | -1.71           |

\*: ND means NOT detected.
